1

2

3

4 **Mechanisms underlying microglial colonization of developing neural**  
5 **retina in zebrafish**

6

7

8 **Nishtha Ranawat and Ichiro Masai\***

9

10 **Developmental Neurobiology Unit, Okinawa Institute of Science and Technology**  
11 **Graduate University, Tancha 1919-1, Onna, Okinawa 904-0495, Japan**

12

13 \* Correspondence should be addressed: [masai@oist.jp](mailto:masai@oist.jp)

14

15 Running title: Microglia colonization to retina

16 Key words: microglia, zebrafish, retina, blood vessel, neurogenesis

17 Word count of the main text (Introduction/Results/Discussion): 5,699

18

19 **Abstract**

20 Microglia are brain-resident macrophages that function as the first line of defense in  
 21 brain. Embryonic microglial precursors originate in peripheral mesoderm and migrate  
 22 into brain during development. However, the mechanism by which they colonize the  
 23 brain is incompletely understood. The retina is one of the first brain regions to  
 24 accommodate microglia. In zebrafish, embryonic microglial precursors use intraocular  
 25 hyaloid blood vessels as a pathway to migrate into the optic cup via the choroid fissure.  
 26 Once retinal progenitor cells exit from the cell cycle, microglial precursors associated  
 27 with hyaloid blood vessels start to infiltrate the retina preferentially through neurogenic  
 28 regions, suggesting that colonization of retinal tissue depends upon the neurogenic state.  
 29 Upstream of blood vessels and retinal neurogenesis, IL34 also promotes microglial  
 30 precursor colonization of the retina. Altogether, CSF receptor signaling, blood vessels,  
 31 and neuronal differentiation, function as guidance cues, and create an essential path for  
 32 microglial migration into developing retina.

33

34 (150 words)

35

36

## 37 **Introduction**

38 Microglia are the resident macrophages of brain. These dedicated CNS phagocytes form  
 39 the innate immune system of embryonic and adult brain. Microglia eliminate cellular  
 40 debris to prevent neuro-inflammation and to promote neuronal protection in vertebrates  
 41 (Ashwell, 1991; Caldero et al., 2009; Lawson et al., 1990; Neumann et al., 2009; Sierra  
 42 et al., 2010). They also prune unnecessary synapses to establish functional, mature  
 43 neural circuits during brain development, performing a variety of cellular functions  
 44 (Paolicelli et al., 2011; Tremblay et al., 2010). In contrast to other CNS cells, like  
 45 neurons and astrocytes, microglia do not originate from neural plate, but are derived  
 46 from mesoderm (Ashwell, 1991; Boya et al., 1979) through hematopoiesis (Ginhoux et  
 47 al., 2013). In developing zebrafish, embryonic hematopoiesis occurs in successive  
 48 waves that are separated anatomically and temporally. The primitive or first wave of  
 49 microglial precursors is generated from myeloid cells originating in the rostral blood  
 50 island (RBI) at about 11 hours post-fertilization (hpf) (Stachura and Traver, 2011; Xu et  
 51 al., 2012). The definitive wave is contributed by the ventral wall of the dorsal aorta  
 52 (VDA), giving rise to hematopoietic stem cells (HSCs) (Xu et al., 2015). In addition, a  
 53 short intermediate wave also originates from the posterior blood island (PBI) (Bertrand  
 54 et al., 2007). After 2 weeks post-fertilization, VDA derived-microglia progressively  
 55 replace RBI-derived microglia throughout the CNS (Ferrero et al., 2018; Xu et al.,  
 56 2015). Thus, primitive and definitive hematopoiesis contribute embryonic and adult  
 57 microglia, respectively, during zebrafish development.

58       Generation of embryonic microglial precursors and their colonization of brain  
 59 areas has been extensively described in zebrafish (Herbomel et al., 2001). In zebrafish,  
 60 embryonic microglial precursors are initially specified in lateral plate mesoderm and  
 61 then spread on yolk. They start to migrate into the cephalic mesenchymal region after  
 62 22 hpf. At 26 – 30 hpf, a few microglia are observed in the vitreous space or choroid  
 63 fissure of the optic cup, and around 30 microglia colonize the neural retina by 48 hpf.  
 64 Microglial colonization of the optic tectum and other regions of zebrafish brain occurs  
 65 after 48 hpf, indicating that the retina is one of the first brain regions to be colonized by  
 66 microglia during development.

Previous studies have suggested various signals that promote microglial colonization in brain. In mice, Cxcl12/Cxcr4 signaling orchestrates microglial migration into developing cerebral cortex (Arno et al., 2014; Hattori and Miyata, 2018). In zebrafish, microglia migrate from the yolk-sac and colonize the brain in an apoptosis-dependent manner (Casano et al., 2016; Xu et al., 2016). Microglial precursors also migrate into the cephalic mesenchymal area in a Colony Stimulating Factor-Receptor (CSF-R)-dependent manner (Herbomel et al., 2001; Wu et al., 2018). Zebrafish *fms* mutants carry a genetic mutation in CSF-R and show severe delays in microglial colonization of both brain and retina, as well as an increase in neuronal apoptosis (Herbomel et al., 2001). Recently, it was reported that brain colonization by microglial precursors depends primarily on one zebrafish CSF-R, CSF1ra, and one CSF-R ligand, IL34, and that this combination of CSF ligand and receptor dominates this process (Wu et al., 2018). Importantly, the number of microglia in the brain and retina is reduced in zebrafish *il34* mutants that overexpress anti-apoptotic protein, Bcl2. Thus, apoptosis and the IL34-CSF1ra signaling pathway cooperate to promote microglial colonization of the brain and retina during zebrafish development.

In developing zebrafish retina, neurogenesis is initiated in the ventro-nasal retina, adjacent to the optic stalk at 25 hpf and progresses to the whole region of the neural retina, suggesting a spatio-temporal pattern of retinal neurogenesis in zebrafish (Hu and Easter, 1999; Masai et al., 2000). Retinal progenitor cells are multipotent and give rise to six major classes of neurons and one type of glial cells. Two types of photoreceptors, rods, and cones form the outer nuclear layer (ONL). Three interneurons, amacrine cells, bipolar cells, and horizontal cells form the inner nuclear layer (INL). Retinal ganglion cells (RGCs) form the RGC layer. Synaptic connections between photoreceptors and bipolar/horizontal cells form the outer plexiform layer (OPL), and synaptic connections between RGCs and bipolar/amacrine cells form the inner plexiform layer (IPL). Cell fate determination is less dependent on the cell lineage of retinal progenitor cells, suggesting that both extrinsic and intrinsic mechanisms influence the status of retinal progenitor multipotency, leading to generation of diverse retinal cell types (He et al., 2012). These developmental profiles of retinal neurogenesis and cell differentiation may be coupled with microglial colonization. Although apoptosis and CSF-R signaling are suggested in microglial colonization of the retina in

99 zebrafish (Wu et al., 2018), the mechanism underlying microglial colonization of the  
100 retina remains to be determined.

101 In this study, using zebrafish, we examined the developmental profile of retinal  
102 colonization by microglia. The number of ocular microglial precursors progressively  
103 increases from 32 to 54 hpf. Most microglial precursors do not proliferate, suggesting  
104 that microglial colonization of the retina depends on cell migration from outside the  
105 optic cup. We found three sequential guidance mechanisms driving microglial precursor  
106 colonization of the retina. First, IL34 initiates microglial precursor movement from yolk  
107 toward the brain and the retina. Second, microglia precursors enter the optic cup via  
108 ocular hyaloid blood vessels in the choroid fissure, suggesting that these blood vessels  
109 guide microglia to the retina. Third, microglial precursors infiltrate the neural retina  
110 preferentially through the neurogenic region, suggesting that the neurogenic state of  
111 retinal tissue acts as an entry signal for microglial precursors to infiltrate the retina.  
112 Thus, a series of guidance mechanisms promote microglial colonization from yolk to  
113 the neural retina in zebrafish.

114

115

## 116 **Results**

### 117 **Embryonic microglial precursors progressively colonize developing zebrafish** 118 **retina**

119 In zebrafish, early macrophages are generated from myeloid cells originating in the RBI  
120 around 11 hpf and they colonize the brain and retina by 55 hpf (Xu et al., 2015). Around  
121 60 hpf, these brain and retina-resident macrophages undergo a phenotypic transition,  
122 which indicates expression of mature microglial markers, such as apolipoprotein E (apo  
123 E) and phagocytic behavior toward dead cells (Herbomel et al., 2001). Importantly,  
124 early macrophages outside the brain never express apo E (Herbomel et al., 2001),  
125 suggesting that only brain and retina-resident macrophages give rise to microglia. Thus,  
126 early macrophages localized in the brain and retina by 60 hpf are generally accepted as  
127 microglial precursors in zebrafish. In this study, we focus on microglial precursors  
128 colonizing the zebrafish retina.

129 To ascertain how microglia precursors migrate from peripheral tissues into the  
130 neural retina during development, we used two macrophage markers, *macrophage*  
131 *expressing gene 1.1* (*mpeg1.1*) (Ellett et al., 2011) and *microfibrillar-associated protein*  
132 *4* (*mfap4*) (Walton et al., 2015). First, we generated a zebrafish transgenic line,  
133 *Tg[mpeg1.1:EGFP]*, using the original DNA construct (Ellett et al., 2011). As  
134 previously reported (Ellett et al., 2011), our established transgenic line visualized ocular  
135 microglial precursors and enabled us to monitor their number and location within the  
136 optic cup from 24 to 54 hpf. Accordingly, we obtained 3D images using confocal laser  
137 scanning microscopy (LSM) (Figure 1A and 1B). The first microglial precursor cells  
138 appeared near the choroid fissure and lens around 30 – 32 hpf. After that, the number of  
139 ocular microglial precursors increased to 20 at 42 hpf and 30 at 54 hpf (Figure 1C),  
140 indicating a progressive increase in the number of ocular microglial precursors. Next, to  
141 determine more precisely the spatial distribution of microglial precursors in the optic  
142 cup, we generated another transgenic line, *Tg[mfap4:tdTomato-CAAX]*, using the  
143 original DNA construct (Walton et al., 2015). As previously reported (Walton et al.,  
144 2015), our established transgenic line efficiently labeled ocular microglial precursor  
145 membranes. We labeled this transgenic embryo using Bodipy ceramide conjugated with  
146 fluorescent Alexa-488, which visualizes retinal layer structures (Figure 1–figure  
147 supplement 1). From 32 – 36 hpf, *mfap4*<sup>+</sup> cells were mostly located in the vitreous

space between the neural retina and lens, and possibly associated with ocular blood vessels, which develop around the lens. In 42 – 44-hpf retina, a few microglial precursor cells start to enter the neural retina and spread toward the emerging IPL, where they are associated with newly born amacrine cells (Figure 1–figure supplement 2). By 54 hpf, IPL formation is complete and microglial precursors were observed throughout all retinal tissue, except the OPL. Thus, microglial precursors enter the optic cup along the choroid fissure at 30 hpf, remain temporarily in the vitreous space between the lens and the retina, and then begin spreading into differentiating retinal tissue after 42 hpf.

Next, to evaluate the contribution of cell proliferation to the increasing number of ocular microglial precursors, we labeled ocular microglial precursors with markers of DNA replication. Here we used a zebrafish transgenic line, *Tg[EF1 $\alpha$ : mCherry-zGem]*, which specifically marks proliferative cells in S and G2 phases (Mochizuki et al., 2017; Mochizuki et al., 2014). We combined this *Tg[EF1 $\alpha$ : mCherry-zGem]* system with *Tg[mpeg1.1:EGFP]* to calculate the fraction of proliferative microglial precursors undergoing S phase (Figure 1D and Video 1). First, we observed mCherry-zGem; mpeg1.1:EGFP double-positive cells in the peripheral tissue (Figure 1–figure supplement 3A-C) and found that more than 60% of mpeg1.1:EGFP-positive cells expressed mCherry-zGem (Figure 1–figure supplement 3D), confirming that this *Tg[EF1 $\alpha$ : mCherry-zGem]* system works in early macrophages in zebrafish. However, in the retina, the fraction of mCherry-zGem; mpeg1.1:EGFP double-positive cells was less than 2% of all microglial precursors from 33.5 to 54 hpf (Figure 1E). Furthermore, more than 80% of mpeg1.1:EGFP-positive cells did not incorporate BrdU at 48 hpf (Figure 1–figure supplement 4), suggesting that a majority of ocular microglial precursors do not undergo S phase. Thus, microglial colonization of the retina mostly depends on cell migration from outside the optic cup.

173

#### 174 **Embryonic microglial precursor migration into the retina depends on blood vessels**

The zebrafish retina receives its blood supply from two blood vessel systems, intraocular hyaloid blood vessels encapsulating the lens (Hartsock et al., 2014) and superficial choroidal blood vessels (Kaufman et al., 2015). Developing hyaloid blood vessels start to enter the space between the lens and retina through the ventral fissure at

179 18 – 20 hpf. Its loop formation occurs around the lens at 24 – 28 hpf, and a branched  
180 hyaloid network forms after 35 hpf (Hartsock et al., 2014). Our live imaging showed  
181 that microglial precursors enter the optic cup through the choroid fissure and remain  
182 temporarily in the vitreous space between the lens and the retina before they infiltrate  
183 the neural retina (Figure 1—figure supplement 1). Furthermore, microglial precursors  
184 start to enter the optic cup after loop formation of hyaloid blood vessels is completed,  
185 suggesting a guiding role of blood vessels in microglial precursor colonization of the  
186 optic cup. To confirm whether microglial precursors entering the ocular space are  
187 associated with developing hyaloid blood vessels, we conducted time-lapse imaging of  
188 *Tg[kdrl:EGFP; mfap4-tdTomato-CAAX]* transgenic embryos, which visualizes  
189 endothelial cells of blood vessels (Jin et al., 2005) and ocular microglial precursors,  
190 respectively. The first microglial precursor was always associated with ocular hyaloid  
191 blood vessels around 30 hpf (Figure 2A) and moved along blood vessel surfaces (Video  
192 2), so it is very likely that microglial precursors use blood vessels as a scaffold to enter  
193 the vitreous space between the lens and the neural retina. Microglial precursors move  
194 along hyaloid blood vessels in the ventral fissure, gradually leave vessel surfaces, and  
195 invade the neural retina through the basement membrane (Figure 2B, Figure 2—figure  
196 supplement 1, and Video 3).

197 Troponin T2A (*tnnt2a*; silent heart) is specifically expressed in heart and is  
198 essential for heart contraction (Sehnert et al., 2002). In zebrafish brain and mouse retina,  
199 haemodynamics drive blood vessel pruning, and loss of blood circulation causes blood  
200 vessel regression (Chen et al., 2012; Lobov et al., 2011; Yashiro et al., 2007). To  
201 examine whether the entry of microglial precursors into retina is altered on blood vessel  
202 regression, we blocked blood circulation by injecting morpholino antisense oligos  
203 against *tnnt2a* (*tnnt2a* MO). When blood circulation is inhibited, ocular hyaloid blood  
204 vessels do not develop fully and microglia were less likely to be associated with these  
205 thin blood vessels (Figure 2C). The number of ocular microglial precursors was  
206 significantly reduced at 36 hpf (Figure 2D), showing that microglial colonization of the  
207 optic cup depends upon normal development of the blood vessel network. This is in  
208 contrast to the case of microglial colonization of zebrafish midbrain and optic tectum,  
209 which is independent of the blood vessel network (Xu et al., 2016). Indeed, we  
210 confirmed that the number of microglial precursors in the optic tectum was not



211 significantly different between *tnnt2a* morphants and standard MO-injected embryos at  
212 72 hpf, although microglial precursor colonization of the optic tectum was enhanced in  
213 *tnnt2a* morphants at 48 hpf (Figure 2–figure supplement 2).

214 Recent studies indicate that microglia facilitate ocular blood vessel development  
215 (Checchin et al., 2006; Fantin et al., 2010; Rymo et al., 2011), and that macrophages  
216 initiate a cell-death program in endothelial cells for blood vessel pruning in developing  
217 mouse retina (Lang and Bishop, 1993; Lobov et al., 2005). However, we eliminated  
218 microglial precursors with morpholino antisense oligos against *pu.1* (*pu.1*-MO) or  
219 *interferon regulatory factor 8* (*irf8*) mutation (*irf8* causes apoptosis of *pu.1*-positive  
220 myeloid cells) (Shiau et al., 2015), and confirmed that microglial precursor elimination  
221 did not affect hyaloid blood vessel formation in zebrafish at least by 48 hpf (Figure 2–  
222 figure supplement 3).

223

## 224 **Microglial precursors infiltrate the neural retina preferentially through the** 225 **differentiating neurogenic area**

226 In zebrafish, retinal neurogenesis occurs at the ventronasal retina adjacent to the optic  
227 stalk at 25 hpf and propagates into the entire region of the neural retina at 33 hpf (Masai  
228 et al., 2000). Microglial precursors start to migrate from the vitreous space into the  
229 neural retina after 42 hpf, when the earliest neurons, RGCs, differentiate to form the  
230 RGC layer. To examine the role of retinal neurogenesis and RGC differentiation in  
231 microglia precursor infiltration of the neural retina, we used two transgenic lines,  
232 *Tg[EF1α: mCherry-zGem; mpeg1.1:EGFP]*, which enable us to examine the  
233 relationship between microglial precursor migration and retinal progenitor cells  
234 (Mochizuki et al., 2014). Live imaging of *Tg[EF1α: mCherry-zGem; mpeg1.1:EGFP]*  
235 retinas at 42 and 48 hpf clearly showed that microglial precursors avoid mCherry-  
236 zGem-positive proliferating regions and are preferentially positioned in the region of  
237 mCherry-zGem-negative post-mitotic cells (Figure 3A–B, Figure 3–figure supplement  
238 1). The fraction of microglial precursors that infiltrated mCherry-zGem-positive  
239 proliferating regions was 7.37% at 42 hpf and 6.13% at 48 hpf (Figure 3C), suggesting  
240 that >90% of microglial precursors infiltrate the retina through the mCherry-zGem-  
241 negative post-mitotic cell region. We also used another transgenic line *Tg[ath5:EGFP;*  
242 *mfap4-tdTomato-CAAX]*. In the *Tg[ath5:EGFP]* line, EGFP starts to be expressed in

G2 phase of the final neurogenic cell division of retinal progenitor cells and is inherited by their daughter cells, which are negative for BrdU incorporation (Poggi et al., 2005; Yamaguchi et al., 2010), suggesting that *ath5:EGFP* specifically marks early differentiating retinal neurons. We conducted live imaging of *Tg[ath5:EGFP; mfap4-tdTomato-CAAX]* retinas at 36, 42, 48 hpf, and found that infiltration of mfap4-positive microglia preferentially occurs in the *ath5:EGFP*-positive region (Figure 3D). These data suggest that microglial precursors infiltrate the neural retina preferentially through the neurogenic area, raising the possibility that the neurogenic retinal region acts as a gateway through which microglial precursors move from the vitreous space into the neural retina.

Colonization of the optic tectum by microglial precursors depends on neuronal apoptosis in zebrafish (Casano et al., 2016; Xu et al., 2016). Therefore, it is still possible that microglial precursors preferentially infiltrate the neural retina through the neurogenic region, because of neuronal apoptosis. We inhibited retinal apoptosis by injecting morpholino antisense oligos against p53 (p53 MO) and confirmed that p53 MO effectively suppresses retinal apoptosis at 24 and 36 hpf (Figure 3—figure supplement 2). However, the number of microglial precursors did not differ between p53 morphant retinas and standard-MO-injected retinas at 48 hpf (Figure 3—figure supplement 3AB), whereas the number of microglial precursors was significantly decreased in p53 morphant optic tectum compared with standard-MO-injected optic tectum at 96 hpf (Figure 3—figure supplement 3CD). Thus, in contrast to microglial colonization of the optic tectum, neuronal apoptosis is not the major cue for microglial precursor colonization of the retina, at least prior to 54 hpf.

### **Neurogenesis acts as a gateway for microglial precursors to enter the retina**

To confirm the possibility that the neurogenic retinal region functions as a gateway for microglial precursors to infiltrate the retina, we examined whether microglial precursor migration into the retina is compromised when retinal neurogenesis is affected. Previously, we found that histone genesis slowed in zebrafish *stem loop binding protein 1* (*slbp1*) mutants, leading to severe delays in retinal neurogenesis (Imai et al., 2014). Our bulk RNAseq analysis confirmed that retinal neurogenesis and subsequent neuronal differentiation were markedly delayed in zebrafish *slbp1* mutants (Figure 4—figure

275 supplement 1), such that *ath5* expression spread into the entire *slbp1* mutant retina only  
 276 at 48 hpf, an event that occurs in wild-type retina at 33 hpf (Imai et al., 2014). We  
 277 combined *slbp1* mutants with transgenic lines *Tg[ath5:EGFP; mfap4: tdTomato-CAAX]*  
 278 and examined the number of ocular mfap4-tdTomato-CAAX-positive microglial  
 279 precursors (Figure 4A, Figure 4–figure supplement 2A and 3). In 48-hpf *slbp1* mutant  
 280 retinas, only 4 - 5 mfap4<sup>+</sup> microglial precursors are present (Figure 4A, B), which is  
 281 similar to the number in wild-type retinas at 32 hpf (Figure 1B), whereas 15 - 20 mfap4<sup>+</sup>  
 282 microglial precursors colonized wild-type sibling retinas at 48 hpf (Figure 4A, B). To  
 283 confirm whether the *slbp1* mutation interferes with genesis of early macrophages, we  
 284 examined peripheral mfap4<sup>+</sup> cells in the tail/trunk region of *slbp1* mutants and wild-type  
 285 sibling embryos. There was no significant difference in mfap4<sup>+</sup> cells between *slbp1*  
 286 mutants and wild-type siblings in the trunk/tail region (Figure 4C, D), indicating that  
 287 the *slbp1* mutation does not influence early macrophage specification in zebrafish  
 288 embryos. Although inhibition of retinal apoptosis by p53 MO does not influence  
 289 microglial colonization of the retina (Figure 3–figure supplement 3AB), we examined  
 290 the level of retinal apoptosis in *slbp1* mutants. TUNEL revealed that apoptosis was  
 291 increased in *slbp1* mutant retinas compared with wild-type sibling retinas (Figure 4–  
 292 figure supplement 4). These data exclude the possibility that decreased retinal apoptosis  
 293 affects microglial precursor colonization of the retina in *slbp1* mutants, and again  
 294 confirms that neuronal apoptosis is not the major cue for microglial precursor  
 295 colonization of the retina.

296        Mouse brain cortex colonization by microglia depends on the Cxcl12a-Cxcr4  
 297 signaling axis (Arno et al., 2014). We previously reported that *cxcl12a* expression is  
 298 absent in the optic stalk of zebrafish *slbp1* mutants (Imai et al., 2014). To exclude the  
 299 possibility that the absence of *cxcl12a* expression in the optic stalk affects microglial  
 300 colonization of the retina in zebrafish *slbp1* mutants, we examined zebrafish *cxcl12a*  
 301 morphants. Injection of *cxcl12a*-MO at 500  $\mu$ M, which effectively induces RGC axon  
 302 trajectory defects reported in zebrafish *odysseys* mutants carrying mutations in *cxcl12a*  
 303 receptor, *cxcr4b* (Li et al., 2005), did not affect the number of ocular microglial  
 304 precursors (Figure 4–figure supplement 5). Thus, Cxcl12a-Cxcr4 signaling is not  
 305 involved in microglial colonization defects in *slbp1* mutants. We also confirm that

elimination of microglial precursors with pu.1 MO did not affect the rate of retinal neurogenesis or cell differentiation by 72 hpf (Figure 4—figure supplement 6).

We previously showed that overexpression of Notch1 intracellular domain (NICD) suppresses retinal neurogenesis in zebrafish (Yamaguchi et al., 2005). We confirmed that overexpression of NICD suppresses retinal neurogenesis in zebrafish by injecting DNA expression constructs encoding UAS:myc-NICD (Scheer and Campos-Ortega, 1999) into *Tg[hsp:gal4; ath5:EGFP]* double transgenic embryos (Figure 4—figure supplement 7). Next, we examined whether microglial precursor infiltration of the retina is compromised in retinas overexpressing NICD. We established a zebrafish transgenic line, *Tg[rxl:gal4-VP16]*, which expresses Gal4-VP16 under control of a retinal progenitor-specific promoter *rxl* (Chuang et al., 1999), and then injected two DNA expression constructs encoding UAS:EGFP (Koster and Fraser, 2001) and UAS:myc-NICD into *Tg[rxl:gal4-VP16; mfap4:tdTomato-CAAX]* double-transgenic embryos. Embryos injected with only the DNA construct of UAS:EGFP served as a positive control. We selected embryos in which EGFP was expressed in most retinal cells at 24 hpf and used them for further analysis. The number of ocular microglial precursors was significantly reduced in embryos overexpressing NICD and EGFP, compared with control embryos overexpressing EGFP, at 44 hpf (Figure 4E, F, Figure 4—figure supplement 2B and 3). These data support the possibility that the retinal neurogenic region functions as a gateway for microglia to infiltrate the retina.

The blockade of retinal neurogenesis delays differentiation of the first-born retinal cell-type, RGCs. To examine whether blockade of RGC differentiation affects microglial precursor colonization of the neural retina, we applied an antisense morpholino against *ath5* (known as *atoh7*) (*ath5* MO). As with the zebrafish *ath5* mutant, *lakritz* (Kay et al., 2001), RGC differentiation was specifically inhibited in *ath5* morphant retinas (Figure 4—figure supplement 8A, B). In *ath5* morphants, the timing of the first appearance of microglial precursors in the ocular vitreous space was not altered, but the number of ocular microglial precursors was significantly decreased at 48 hpf (Figure 4G, H, and Figure 4—figure supplement 2C, 3 and 8C), suggesting that RGC differentiation or RGC-mediated IPL formation is required for microglial precursor infiltration into the neural retina.

### 338 **Microglial precursors preferentially associate with neurogenic retinal columns**

339 To determine whether microglia precursors have greater affinity for differentiating  
 340 neurons than for retinal progenitor cells, we carried out two sets of experiments. First  
 341 we conducted cell transplant experiments using a wild-type donor line and an *slbp1*  
 342 mutant recipient line carrying *Tg[mfap4:tdTomato-CAAX]*. Wild-type donor cells were  
 343 transplanted into *slbp1* mutant recipient embryos at the blastula stage. We selected  
 344 *slbp1* mutant and wild-type sibling embryos in which wild-type, donor retinal cell  
 345 columns were introduced in a mosaic manner at 48 hpf (Figure 5A). Host microglial  
 346 precursors and donor retinal cells were visualized with mfap4:tdTomato-CAAX and  
 347 Alexa-488 Dextran, respectively. In *slbp1* mutant host retinas, microglial precursors  
 348 were likely to be associated with donor wild-type retinal columns more frequently than  
 349 in wild-type host retinas (Figure 5B). To analyze these data statistically, we compared  
 350 eyes in which wild-type donors were transplanted into wild-type hosts with those in  
 351 which wild-type donors were transplanted into *slbp1* mutant hosts (Figure 5-figure  
 352 supplement 1AB). The fraction of microglial precursors associated with donor wild-type  
 353 retinal columns in total ocular microglial precursors was significantly higher in *slbp1*  
 354 mutant host retinas than in wild-type sibling host retinas at 48 hpf (Figure 5C),  
 355 suggesting that microglial precursors are more attracted by wild-type donor neurogenic  
 356 retinal columns than surrounding *slbp* mutant proliferative retinal cells. Since the  
 357 fraction of microglial precursors associated with donor retinal columns in total  
 358 microglial precursors may depend on the number of donor retinal columns incorporated  
 359 into host retinas, we next estimated trapping efficiency of microglia per donor column  
 360 by dividing the fraction of microglia associated with donor columns with the  
 361 transplanted donor column number in each eye (Figure 5-figure supplement 1B).  
 362 Trapping efficiency of microglia per donor column was significantly higher in *slbp1*  
 363 mutant host retinas than in wild-type sibling host retinas (Figure 5D), suggesting that  
 364 microglial precursors are preferentially associated with donor-derived wild-type retinal  
 365 cells than with host-derived *slbp1* mutant retinal cells.

366 Second, we injected two DNA constructs encoding UAS:EGFP and  
 367 UAS:mycNICD into *Tg[hsp:gal4; mfap4:tdTomato-CAAX]* double-transgenic wild-  
 368 type embryos. Two rounds of heat-shock treatment at 18 and 30 hpf induced expression  
 369 of NICD and EGFP in a mosaic manner in the retina (Figure 5E). We examined the

fraction of *mfap4:tdTomato*-CAAX-positive microglial precursors associated with EGFP-expressing retinal columns in the total number of *mfap4:tdTomato*-CAAX-positive microglial precursors (Figure 5F). The fraction was significantly lower in retinas overexpressing NICD and EGFP than control retinas overexpressing only EGFP (Figure 5G, Figure 5-figure supplement 1C). We also confirmed that trapping efficiency of *mfap4:tdTomato*-CAAX-positive microglial precursors per EGFP-positive retinal column was significantly lower in retinas overexpressing NICD and EGFP than in retinas overexpressing only EGFP (Figure 5H, Figure 5-figure supplement 1C). Thus, microglial precursors are less attracted by retinal columns in which neurogenesis was arrested. Taken together, these data suggest that microglial precursors preferentially associate with neurogenic retinal columns as opposed to proliferative retinal columns.

381

### 382 **IL34 is involved in microglial precursor colonization of the retina**

383 Recently, it was reported that microglial colonization of zebrafish brain depends on  
384 CSF-R, and that one of the CSF-R ligands, IL34, dominates this process (Wu et al.,  
385 2018). In adult mouse retina, RGCs express IL34, which attracts one subset of microglia  
386 and retains them around the IPL niche (O'Koren et al., 2019). First, we confirmed that  
387 retinal cell differentiation proceeds normally until 72 hpf in zebrafish *il34* mutants,  
388 although pyknotic nuclei were stochastically observed in RGC and amacrine cell layers  
389 (Figure 6-figure supplement 1). Next, we examined microglial precursor colonization of  
390 the retina. The number of ocular microglial precursors was significantly lower in *il34*  
391 homozygous mutants than in wild-type siblings at 48 hpf (Figure 6A, B). The number of  
392 ocular microglial precursors in *il34* heterozygous mutants was mildly decreased but did  
393 not differ significantly from wild-type siblings (Figure 6A, B), consistent with the  
394 previous report (Wu et al., 2018). Thus, IL34 is required for microglial precursor  
395 colonization of the retina in zebrafish. However, *il34* mRNA expression is comparable  
396 in *slbp1* mutant heads and wild-type sibling heads at 48 hpf (Figure 6-figure  
397 supplement 2), suggesting that *il34* mRNA expression is not linked to retinal  
398 neurogenesis. Since the number of ocular microglial precursors in *il34* homozygous  
399 mutants was no more than two, if any, at 48 hpf (Figure 6B), it is very likely that Csf1r-  
400 il34 signaling promotes microglial precursor movement from yolk to the optic cup  
401 upstream of blood vessel-mediated guidance mechanism (Figure 6C).

402

403



## 404 Discussion

405 In zebrafish, primitive microglia originate from the RBI, which is a hematopoietic tissue  
 406 equivalent to mouse yolk sac, whereas definitive microglia are generated from  
 407 hematopoietic stem cells that are specified in the VDA (Ferrero et al., 2018; Xu et al.,  
 408 2015). Primitive and definitive waves of hematopoiesis generate embryonic and adult  
 409 microglia, respectively. Using zebrafish as an animal model, several groups investigated  
 410 microglial colonization from the periphery into developing brain, especially the optic  
 411 tectum, which is part of the midbrain (Casano et al., 2016; Herbomel et al., 2001; Svahn  
 412 et al., 2013; Wu et al., 2018; Xu et al., 2016). Colonization of the optic tectum by  
 413 microglial precursors depends on neuronal apoptosis, probably through attraction by  
 414 apoptotic cell-secreted phospholipid, lysophosphatidylcholine (LPC) (Casano et al.,  
 415 2016; Xu et al., 2016). In addition, microglial colonization of brain is CSF receptor-  
 416 dependent (Herbomel et al., 2001; Wu et al., 2018). In mice, microglial colonization of  
 417 brain requires functional blood circulation (Ginhoux et al., 2010). However, in zebrafish,  
 418 microglial colonization of the optic tectum is independent of blood circulation (Xu et al.,  
 419 2016). A series of elegant studies revealed the molecular network that promotes  
 420 microglial colonization of the midbrain. However, it remains to be seen whether this  
 421 mechanism fully explains colonization of other brain regions by microglial precursors.  
 422 In this study, we focused on zebrafish retina and investigated the mechanism that  
 423 regulates migration of embryonic microglial precursors into developing retina.

424 We first conducted live imaging of zebrafish microglial precursors from 24 to 54  
 425 hpf. Microglial precursors progressively increase in number during embryonic  
 426 development. Interestingly, almost all microglial precursors enter the optic cup through  
 427 the choroid fissure. However, peripheral macrophages located in the mesenchymal  
 428 region between the eye and the brain did not enter the optic cup across the ciliary  
 429 marginal zone. This may be consistent with the observation that these peripheral  
 430 macrophages never enter the retina following rod cell death (White et al., 2017),  
 431 suggesting a functional difference between peripheral macrophages and ocular  
 432 microglia. Next, we found that a majority of ocular microglial precursors do not  
 433 undergo S phase and are probably in G1 phase. Thus, the increase of ocular microglial  
 434 precursors is due to migration from outside the eye. In developing mouse retina,  
 435 microglial precursors appear from the vitreous area near the optic disk at E11.5,



436 progressively increase in number, and then infiltrate the neural retina. These retinal  
437 microglia were also negative for a proliferative marker, Ki67 (Santos et al., 2008),  
438 suggesting that mouse embryonic retinal microglia are also non-proliferative.

439 Another interesting finding is that entry of microglial precursors into the optic  
440 cup through the choroid fissure depends on ocular blood vessels. We observed that  
441 migrating microglial precursors are closely associated with hyaloid blood vessels after  
442 loop formation. These microglial precursors pass along these vessels, which traverse the  
443 choroid fissure and surround the posterior region of the lens. Furthermore, the number  
444 of ocular microglial precursors was reduced when blood circulation was blocked. Since  
445 the inhibition of blood circulation compromises structural integrity of blood vessels in  
446 zebrafish, we conclude that ocular blood vessel formation is required for microglial  
447 precursor entry into the optic cup through the choroid fissure. One possibility is that  
448 blood vessels function as a path upon which microglial precursors enter the optic cup.  
449 Membrane proteins or extracellular matrix proteins on blood endothelial cells may  
450 facilitate the association of microglia with blood vessel surfaces. Alternatively,  
451 substances that attract microglial precursors may be released from hyaloid blood  
452 endothelial cells. Previous studies on human and murine microglia demonstrated that  
453 microglial colonization of the retina takes place prior to retinal vascularization, and that  
454 microglia facilitate ocular blood vessel development (Checchin et al., 2006; Fantin et al.,  
455 2010; Rymo et al., 2011). Macrophages initiate endothelial cell death for blood vessel  
456 pruning in developing mouse retina (Lang and Bishop, 1993; Lobov et al., 2005).  
457 However, in contrast to mammals, elimination of microglia by *pu.1* MO or *irf8*  
458 mutation did not affect ocular blood vessel formation, suggesting that microglia do not  
459 regulate ocular blood vessel formation in zebrafish. Interestingly, classic histological  
460 studies on mouse retinas showed that early emerging ocular microglia are associated  
461 with the hyaloid artery (Hume et al., 1983; Santos et al., 2008), which is located in the  
462 vitreous area and regresses in later stages before retinal vasculature formation (Ito and  
463 Yoshioka, 1999). Thus, further investigation will be necessary to determine whether the  
464 hyaloid artery guides microglial precursors into the optic cup in vertebrate species such  
465 as mice. In zebrafish, colonization of the optic tectum by microglial precursors is  
466 independent of blood circulation (Xu et al., 2016). We confirmed that the number of  
467 microglial precursors in the optic tectum did not differ between *tnnt2a* morphants and

control embryos at 72 hpf; however, microglial colonization of the optic tectum was enhanced and microglial shape was round rather ramified in *tnnt2a* morphants at 48 hpf. Further study will be necessary to clarify the role of blood circulation in microglial colonization of the optic tectum.

After 42 hpf, microglia detach from hyaloid blood vessels and start to infiltrate the neural retina. Interestingly, we found that more than 90% of microglia enter the neural retina through the neurogenic area. Indeed, the number of microglia in the neural retina is reduced in *slbp1* mutant retinas and NICD-overexpressing retinas, in both of which retinal neurogenesis is severely delayed. Furthermore, we conducted two sets of experiments: the first was cell transplantation from wild-type donor cells into *slbp1* mutant host retinas, which introduced neurogenic wild-type retinal cell columns in proliferative *slbp1* mutant retinas, and the second was overexpression of NICD in wild-type retina, which introduced proliferative retinal cell columns in neurogenic retinas. Consistently, in both cases, microglial precursors were preferentially associated with neurogenic retinal cell columns. Thus, neurogenesis is required for infiltration of microglia into the neural retina after 42 hpf. We observed that the number of microglia in the neural retina is diminished in *ath5* morphant retinas, suggesting that the first born-retinal cell-type, RGC, is required for infiltration of microglial precursors into the neural retina. There are at least three possible mechanisms for this infiltration. First, the basal region of retinal progenitor cells may function as a physical barrier that inhibits microglial precursor infiltration of the neural retina. Second, microglial precursors are attracted to the surfaces of differentiating retinal neurons or RGCs. Third, differentiating retinal neurons or RGCs release a specific attractant for microglia. There are several candidate molecules which suggest the third possibility. In adult mice, RGCs express IL34, which attracts microglia and retains them around the IPL niche (O'Koren et al., 2019). Indeed, microglial colonization of zebrafish brain depends on CSF-R, and one of the CSF-R ligands, IL34, dominates this process (Wu et al., 2018). We confirmed that microglial precursor colonization of retina is severely affected in *il34* mutants. However, *il34* mRNA expression is comparable in *slbp1* mutants and their wild-type siblings, suggesting that IL34 is not linked to neurogenesis-mediated microglial precursor infiltration. Rather, the number of ocular microglial precursors in *il34* mutants was almost zero at 48 hpf, so it is very likely that Csf1r-il34 signaling

500 initiates microglial precursor movement from yolk toward brain and retina, followed by  
501 blood vessel- and neurogenesis-mediated guidance.

502 It was reported that apoptosis attracts microglia in zebrafish developing brain  
503 (Casano et al., 2016; Xu et al., 2016). However, microglial colonization of the retina is  
504 normal in zebrafish *p53* morphant retinas, suggesting that apoptosis does not promote  
505 microglial precursor colonization of the retina. Why are microglial precursors  
506 insensitive to retinal apoptosis? We found that apoptosis is enhanced in zebrafish *slbp*  
507 mutant retinas, in which microglial precursor colonization is severely affected due to a  
508 delay of retinal neurogenesis. It is likely that spontaneous apoptotic cells fail to be  
509 eliminated because of the reduced number of microglial precursors in *slbp* mutant  
510 retinas; however, interestingly, these increased dead cells did not promote microglial  
511 precursor infiltration into *slbp* mutant retinas, suggesting that neurogenesis primarily  
512 opens the gate through which microglial precursors enter the neural retina. Since retinal  
513 neurogenesis normally occurs from 24 to 48 hpf in zebrafish, microglial precursors  
514 could not be attracted by apoptosis without the infiltration path opened by neurogenesis  
515 before 48 hpf. Further studies will be necessary to unveil the molecular mechanism  
516 underlying microglial infiltration into neural retina.

517 In summary, there are three sequential mechanisms for microglial colonization  
518 of developing zebrafish retina (Figure 6C). First, IL34-CSF-R signaling initiates  
519 microglial precursor movement from yolk to the brain and retina. Second, microglial  
520 precursors use ocular hyaloid blood vessels as a pathway to enter the optic cup. Third,  
521 microglial precursors start to infiltrate the neural retina preferentially through  
522 neurogenic region. In the future, it remains to identify molecules involved at blood  
523 vessel- and neurogenesis-mediated guidance mechanisms, and to assess whether these  
524 mechanisms are used for microglial colonization of other brain regions in other  
525 vertebrate species.

526

## 527 **Materials and Methods**

### 528 **Fish strains**

529 Zebrafish (*Danio rerio*) were maintained using standard procedures (Westerfield, 1993).  
 530 RIKEN wako (RW) was used as a wild-type strain for mutagenesis (Masai et al., 2003).  
 531 *slbp1*<sup>rw440</sup> (Imai et al., 2014), *irf8*<sup>st96</sup> (Shiau et al., 2015) and *il34*<sup>hkz11</sup> (Wu et al., 2018)  
 532 were used. Transgenic lines *Tg[ath5:EGFP]<sup>rw021</sup>* were used to monitor *ath5* gene  
 533 expression (Masai et al., 2005). *Tg[EF1α:mCherry-zGem]<sup>oki011</sup>* (Mochizuki et al., 2014)  
 534 was used for visualization of cell-cycle phases. *Tg[mfap4:tdTomato-CAAX]<sup>oki058</sup>* and  
 535 *Tg[mpeg1.1:EGFP]<sup>oki053</sup>* were used to visualize microglial precursors.  
 536 *Tg[kdrl:EGFP]<sup>st843Tg</sup>* was employed to visualize blood vessels (Jin et al., 2005).  
 537 *Tg[hsp:gal4]<sup>kca4</sup>* (Scheer et al., 2002) and *Tg[rx1:gal4-VP16]<sup>oki065</sup>* were used for UAS-  
 538 mediated expression of target genes. Embryos were incubated with 0.003%  
 539 phenylthiourea (PTU) to prevent melanophore pigmentation for confocal scanning. The  
 540 zebrafish pigmentation mutant, *roy orbison (roy)* (D'Agati et al., 2017) was used to  
 541 remove iridophores.

### 543 **Ethics statement**

544 All zebrafish experiments were performed in accordance with the Animal Care and Use  
 545 Program of Okinawa Institute of Science and Technology Graduate School (OIST),  
 546 Japan, which is based on the Guide for the Care and Use of Laboratory Animals by the  
 547 National Research Council of the National Academies. The OIST animal care facility  
 548 has been accredited by the Association for Assessment and Accreditation of Laboratory  
 549 Animal Care (AAALAC International). All experimental protocols were approved by  
 550 the OIST Institutional Animal Care and Use Committee.

### 552 **Establishment of *Tg[mpeg1.1:EGFP]* and *Tg[mfap4:tdTomato-CAAX]* transgenic** 553 **lines**

554 The DNA construct encoding mpeg1.1:EGFP was kindly provided by Dr. Graham  
 555 Lieschke and we are indebted to Dr. David Tobin for the construct encoding mfap4-  
 556 tdTomato-CAAX. These DNA constructs were injected into fertilized eggs with Tol2  
 557 transposase mRNA, to establish transgenic lines, *Tg[mpeg1.1:EGFP]* and *Tg[mfap4-  
 558 tdTomato-CAAX]* in our lab.

559

## 560 **Histology**

561 Plastic sectioning and immunolabeling of cryosections were carried out as previously  
562 described (Masai et al., 2003). Anti-GFP (Thermo Fisher Scientific, A11122), anti-myc-  
563 tag (Invitrogen, P/N\_46-0603), zn5 (Oregon Monoclonal Bank) and zpr1 (Oregon  
564 Monoclonal Bank) antibodies were used at 1:200; 1:250, 1:100, and 1:100 dilutions,  
565 respectively. For detection of BrdU incorporation, BrdU was applied to 52-hpf  
566 embryos, chased for 2 h at 28.5°C and fixed with 4% paraformaldehyde (PFA).  
567 Labeling of retinal sections with anti-BrdU antibody was carried out as previously  
568 described (Yamaguchi et al., 2005). TUNEL was performed using an In Situ Cell Death  
569 Detection Kit (Roche). Bodipy-ceramide was applied to visualize retinal layers as  
570 previously described (Masai et al., 2003). Nuclear staining was performed using 1nM  
571 TOPRO3 (Molecular Probes).

572

## 573 **Morpholino**

574 Morpholino antisense oligos were designed as shown below.

575 *tnnt2a* MO: 5'-CAT GTT TGC TCT GAT CTG ACA CGC A-3' (Sehnert et al., 2002)

576 *p53* MO: 5'-GCGCCATTGCTTTGCAAGAATTG-3' (Langheinrich et al., 2002)

577 *cxcl12a* MO: 5'-ACTTTGAGATCCATGTTTGCAAGTG-3' (Li et al., 2005)

578 *pu.1* MO: 5'-GATATACTGATACTCCATTGGTGGT-3' (Rhodes et al., 2005)

579 *ath5* MO: 5'-TTCATGGCTCTTCAAAAAAGTCTCC-3'

580 Standard MO: 5'-CCTCTTACCTCAGTTACAATTTATA-3'

581 Morpholino antisense oligos were injected into fertilized eggs at 500 µM for *tnnt2a* MO  
582 and *cxcl12a* MO; 250 µM for *ath5* MO and *pu.1* MO and 100 µM for *p53* MO. The  
583 same concentration was used for Standard MO in each MO experiment.

584

## 585 **Cell transplantation**

586 Cell transplantation was performed as previously described (Masai et al., 2003). Wild-  
587 type zygotes were injected with Alexa-488 dextran (Molecular Probes) and used for  
588 donor embryos. *slbp1* mutant embryos carrying *Tg[mfap4-tdTomato-CAAX]* were used  
589 as host embryos. Host embryos carrying donor retinal cells were selected by observing  
590 Alexa 488 fluorescence at 24 hpf. *slbp1* mutant and wild-type sibling embryos were

sorted based on the *slbp1* mutant morphological phenotype at 48 hpf and used for live imaging. After confocal images were obtained, the number of ocular mfap4-positive microglial precursors associated with Alexa-488 dextran-labeled donor transplanted retinal columns was counted. The fraction of ocular mfap4-positive microglial precursors associated with donor transplanted retinal columns in total ocular microglial precursors was calculated. The trapping efficiency of ocular mfap4-positive microglial precursors per one transplanted donor retinal column was calculated using the total number of donor transplanted retinal columns in the retina. Detailed information on each transplanted eye is shown in Figure 5-supplement 1AB.

600

### 601 **Live Imaging and Analyses**

Transgene lines *Tg[mpeg1.1:EGFP]* or *Tg[mfap4-tdTomato-CAAX]*, and *Tg[kdrl:EGFP]*, were used for time-lapse imaging of microglial precursors and blood vessels. 3D confocal images were obtained using a confocal LSM, LSM710 (Zeiss) or an FV3000RS (Olympus), and analyzed using ImageJ (2.0.0-rc-69/1.52p) and Imaris software (ver.9.1.2 Bitplane). The DNA construct encoding Ptf1a:EGFP was used for visualizing amacrine cells or their progenitors (Jusuf and Harris, 2009).

608

### 609 **RNA extraction**

Heads of 48 hpf wild-type sibling and *slbp1* mutant embryos were dissected and transferred to 100 µL Sepasol on ice. Heads were then homogenized using a hand homogenizer (~20 pulses). Twenty µL CHCl<sub>3</sub> were then added to samples and mixed gently. After centrifugation at 15,000 g for 15 min, the aqueous phase was collected and mixed with 100 µL isopropanol. One µL of RNase-free glycogen was added to all samples to increase the yield. After incubating at room temperature for 10 min, samples were centrifuged at 15,000 g at 4°C for 15 min. Supernatant was removed and the pellet was washed with 500 µL of 75% ethanol 3x at 8000 g at 4°C. The pellet was then resuspended in a desired amount of nuclease-free water and stored at -80°C. RNA concentration and purity of samples were determined using a Nanodrop.

620

### 621 **RNA sequencing and analysis**

RNA samples with RIN >7 were subjected to pair-end sequencing using an Illumina HiSeq4000 platform. First, a quality check was performed using FastQC and read trimming was done with Trimomatic (Bolger et al., 2014). PRINSEQ lite (Schmieder and Edwards, 2011) was used for PolyA trimming and quality filtering. Trimmed sequences were then mapped to the zebrafish reference genome (GRCz11) using hisat2.1.0 (Kim et al., 2019). With the R package, EdgeR (Robinson et al., 2010), differentially expressed genes with Log<sub>2</sub>FC > |2| and FDR values < 0.01 were extracted. EnhancedVolcano package (<https://github.com/kevinblighe/EnhancedVolcano>) was used to draw volcano plot. A heat map was generated with the pheatmap package (version 1.10.12) (<https://cran.r-project.org/web/packages/pheatmap/index.html>).

### **Evaluation of *il34* mRNA expression by semi-quantitative PCR**

Extracted RNA from 48-hpf wild-type sibling and *slbp1* mutant heads was used to prepare cDNA, using Toyobo ReverTra Ace® qPCR RT master mix with gDNA remover. The expression level of *il34* mRNA was evaluated with quantitative PCR using the primers below. mRNA of cytoplasmic actin β2, namely *actb2* (ZFIN), was used for normalization.

Forward primer for *il34* mRNA: 5'- tgggccagtcgcaatgct-3'

Reverse primer for *il34* mRNA: 5'- gctgcactactgcacactgg -3'

Forward primer for *actb2* mRNA: 5'- tgtcttcccatccatcgtg -3'

Reverse primer for *actb2* mRNA: 5'- tgtcttcccatccatcgtg-3'

### **Mosaic expression of NICD in retinal cells using *Tg[rx1:gal4-VP16]* and *Tg[hsp:gal4]* transgenic lines**

The DNA fragment that covers a 2,892-bp genomic region upstream from the start codon of *rx1* cDNA (Chuang et al., 1999), was amplified by PCR and inserted between *XhoI* and *BamHI* sites of Tol2 base expression vector, pT2AL200R150G (Urasaki et al., 2006). Next, DNA fragments encoding *gal4-VP16* (Koster and Fraser, 2001) were further inserted between *BamHI* and *ClaI* sites of pT2AL200R150G to fuse the *rx1* promoter, respectively. The plasmid was injected with Tol2 transposase mRNA into fertilized eggs of the UAS:EGFP transgenic line to establish a transgenic line, *Tg[rx1:gal4-VP16]<sup>oki065</sup>*. A mixture of plasmids of UAS:EGFP (Koster and Fraser,



2001) and UAS:myc-NICD (Scheer and Campos-Ortega, 1999) (each 10 ng/μL) were injected into fertilized eggs of the *Tg[mfap4:tdTomato-CAAX; rx1:gal4-VP16]* or *Tg[mfap4:tdTomato-CAAX; hsp:gal4]* transgenic line. In the case of the *Tg[mfap4:tdTomato-CAAX; hsp:gal4]* transgenic line, two rounds of heat shock at 37°C for 1 h were applied at 18 and 30 hpf. Embryos expressing EGFP in the optic cup were selected at 24 hpf, fixed with PFA at 48 hpf and used to prepare serial retinal sections for imaging analysis. After confocal images were obtained, the number of ocular mfap4-positive microglial precursors associated with EGFP-expressing columns was counted. The fraction of ocular mfap4-positive microglial precursors associated with EGFP-expressing columns in total microglial precursors was calculated and the trapping efficiency of ocular mfap4-positive microglial precursors per EGFP-expressing column was calculated using the total number of EGFP-expressing columns in the retina. Detailed information on each injected eye is shown in Figure 5-supplement 1C. To confirm that NICD inhibits retinal neurogenesis, UAS:myc-NICD or UAS:mCherry (each 10 ng/μL) was injected into zebrafish transgenic embryos *Tg[ath5:EGFP; hsp:gal4]*. Three rounds of heat shock 37°C for 1 h were applied at 18, 24 and 30 hpf. Embryos were fixed at 36 hpf and labeled with anti-myc tag antibody to visualize myc-NICD expressing retinal cells with Alexa-543-conjugated secondary antibody. Whole retinas were used for confocal scanning with FV3000 (Olympus). Controls were UAS:mCherry-injected samples and used directly for live confocal scanning. Confocal 3D retinal images were used for counting the number of ath5:EGFP-positive and negative retinal columns in myc-NICD or mCherry expressing retinal columns from 5 independent embryos.

677

#### 678 **Evaluation of microglial precursor colonization of the retina in *il34* mutants.**

679 The *il34*<sup>hkc11</sup> allele (Wu et al., 2018) was combined with the *Tg[mfap4:tdTomato]* transgenic line and used for analysis. Embryos were generated by pair-wise crosses between heterozygous mutant male and female fish, and maintained with N-phenyl thiourea (PTU)-containing water to prevent melanophore pigmentation. At 48 hpf, whole retinas of 29 embryos were scanned with confocal microscopy, using an LSM710 (Zeiss) or an FV3000RS (Olympus). Embryos were fixed with 4% PFA and tails were



dissected to use for genotyping. A DNA fragment containing the 4-base deletion mutation of the *il34<sup>hkz11</sup>* allele was amplified by PCR and sequenced to determine genotypes. Primers used for PCR amplification and sequencing are below.

Forward primer for PCR: 5'-tgcaattaaacagccaatgtg-3'

Reverse primer for PCR: 5'-ctgagtcacagccctcaaattc-3'

Forward primer for sequencing: 5'-ccatttggtttacacgacaaa-3'

Reverse primer for sequencing: 5'-gctaattggtgtgggacgtt-3'

Using the surface rendering tool of Imaris software (Bitplane, ver.9.1.2), we eliminated signals of iridophore-derived noise or peripheral microphages around the optic cup and extracted only ocular microglial precursors. The number of ocular microglial precursors was counted in each retina and compared between genotypes.

# **Statistical analysis**

Statistical analyses were performed using GraphPad Prism version 8.2.1. Statistical significance was determined using two-tailed unpaired Student's t-tests for Figs. 2D; 4BDH; 5CDGH; Fig.1-figure supplement 1 and 4B; Fig.2-figure supplement 2B; Fig.3-figure supplement 3BD; Fig.4-figure supplement 4B and 5D; Fig.6-figure supplement 2, Tukey's multiple comparison test for Figs.4F; 6B, and Bonferroni's multiple comparison test for Fig.3-figure supplement 2B. Chi square tests were used for Fig. 4-figure supplement 7C. Detailed information on each dataset is provided in Excel files in Raw data.

# **Data availability**

Raw RNA-seq dataset of *slbp1* mutant and wild-type sibling is available at Gene Expression Omnibus (GSE144517).

## 712 **Acknowledgements**

713 We thank Graham Lieschke for DNA constructs encoding mepg1.1:EGFP, David Tobin  
714 for DNA constructs encoding mfap4-tdTomato-CAAX, Francesco Argenton for DNA  
715 construct encoding Ptf1a:EGFP, William Talbot for zebrafish *irf8* mutant line, Zilong  
716 Wen for zebrafish *il34* mutant line, and José Campos-Ortega for DNA constructs  
717 encoding UAS-myc tagged NICD. We also thank lab members, especially Yuko  
718 Nishiwaki, Yuki Takeuchi, Yutaka Kojima, Jeff Liner, Mamoru Fujiwara, and Tetsuya  
719 Harakuni for supporting experiments. We thank Steven D. Aird for editing the  
720 manuscript.

721

## 722 **Competing interests**

723 The authors declare no competing or financial interests.

724

## 725 **Author contribution**

726 Conceptualization: NR, IM; Methodology: NR, IM; Software: NR; Validation: NR, IM;  
727 Formal analysis: NR, IM; Investigation: NR, IM; Resources: NR, IM; Data curation:  
728 NR, IM; Writing - original draft: NR, IM; Writing - review & editing: NR, IM;  
729 Visualization: NR, IM; Supervision: IM; Project administration: NR, IM; Funding  
730 acquisition: IM.

731

## 732 **Funding**

733 This work was supported by a grant from the Okinawa Institute of Science and  
734 Technology Graduate University to IM.

735

## 736 References

- 737
- 738 **Arno, B., Grassivaro, F., Rossi, C., Bergamaschi, A., Castiglioni, V., Furlan, R.,**  
739 **Greter, M., Favaro, R., Comi, G., Becher, B., et al.** (2014). Neural progenitor cells  
740 orchestrate microglia migration and positioning into the developing cortex. *Nat*  
741 *Commun* **5**.
- 742 **Ashwell, K.** (1991). The distribution of microglia and cell death in the fetal rat  
743 forebrain. *Brain Res Dev Brain Res* **58**, 1-12.
- 744 **Bertrand, J. Y., Kim, A. D., Violette, E. P., Stachura, D. L., Cisson, J. L. and**  
745 **Traver, D.** (2007). Definitive hematopoiesis initiates through a committed  
746 erythromyeloid progenitor in the zebrafish embryo. *Development* **134**, 4147-4156.
- 747 **Bolger, A. M., Lohse, M. and Usadel, B.** (2014). Trimmomatic: a flexible trimmer for  
748 Illumina sequence data. *Bioinformatics* **30**, 2114-2120.
- 749 **Boya, J., Calvo, J. and Prado, A.** (1979). The origin of microglial cells. *Journal of*  
750 *anatomy* **129**, 177-186.
- 751 **Caldero, J., Brunet, N., Ciutat, D., Hereu, M. and Esquerda, J. E.** (2009).  
752 Development of microglia in the chick embryo spinal cord: implications in the  
753 regulation of motoneuronal survival and death. *J Neurosci Res* **87**, 2447-2466.
- 754 **Casano, A. M., Albert, M. and Peri, F.** (2016). Developmental Apoptosis Mediates  
755 Entry and Positioning of Microglia in the Zebrafish Brain. *Cell Rep* **16**, 897-906.
- 756 **Checchin, D., Sennlaub, F., Levavasseur, E., Leduc, M. and Chemtob, S.** (2006).  
757 Potential role of microglia in retinal blood vessel formation. *Invest Ophthalmol Vis Sci*  
758 **47**, 3595-3602.
- 759 **Chen, Q., Jiang, L., Li, C., Hu, D., Bu, J. W., Cai, D. and Du, J. L.** (2012).  
760 Haemodynamics-driven developmental pruning of brain vasculature in zebrafish. *PLoS*  
761 *Biol* **10**, e1001374.
- 762 **Chuang, J. C., Mathers, P. H. and Raymond, P. A.** (1999). Expression of three Rx  
763 homeobox genes in embryonic and adult zebrafish. *Mech Dev* **84**, 195-198.
- 764 **D'Agati, G., Beltre, R., Sessa, A., Burger, A., Zhou, Y., Mosimann, C. and White,**  
765 **R. M.** (2017). A defect in the mitochondrial protein Mpv17 underlies the transparent  
766 casper zebrafish. *Dev Biol* **430**, 11-17.
- 767 **Ellett, F., Pase, L., Hayman, J. W., Andrianopoulos, A. and Lieschke, G. J.** (2011).  
768 mpeg1 promoter transgenes direct macrophage-lineage expression in zebrafish. *Blood*  
769 **117**, e49-56.
- 770 **Fantin, A., Vieira, J. M., Gestri, G., Denti, L., Schwarz, Q., Prykhozhij, S., Peri, F.,**  
771 **Wilson, S. W. and Ruhrberg, C.** (2010). Tissue macrophages act as cellular

772 chaperones for vascular anastomosis downstream of VEGF-mediated endothelial tip cell  
773 induction. *Blood* **116**, 829-840.

774 **Ferrero, G., Mahony, C. B., Dupuis, E., Yvernogeu, L., Di Ruggiero, E.,**  
775 **Miserocchi, M., Caron, M., Robin, C., Traver, D., Bertrand, J. Y., et al.** (2018).  
776 Embryonic Microglia Derive from Primitive Macrophages and Are Replaced by cmyb-  
777 Dependent Definitive Microglia in Zebrafish. *Cell Rep* **24**, 130-141.

778 **Ginhoux, F., Greter, M., Leboeuf, M., Nandi, S., See, P., Gokhan, S., Mehler, M. F.,**  
779 **Conway, S. J., Ng, L. G., Stanley, E. R., et al.** (2010). Fate mapping analysis reveals  
780 that adult microglia derive from primitive macrophages. *Science* **330**, 841-845.

781 **Ginhoux, F., Lim, S., Hoeffel, G., Low, D. and Huber, T.** (2013). Origin and  
782 differentiation of microglia. *Front Cell Neurosci* **7**, 45.

783 **Hartsock, A., Lee, C., Arnold, V. and Gross, J. M.** (2014). In vivo analysis of hyaloid  
784 vasculature morphogenesis in zebrafish: A role for the lens in maturation and  
785 maintenance of the hyaloid. *Dev Biol* **394**, 327-339.

786 **Hattori, Y. and Miyata, T.** (2018). Microglia extensively survey the developing cortex  
787 via the CXCL12/CXCR4 system to help neural progenitors to acquire differentiated  
788 properties. *Genes Cells* **23**, 915-922.

789 **He, J., Zhang, G., Almeida, A. D., Cayouette, M., Simons, B. D. and Harris, W. A.**  
790 (2012). How variable clones build an invariant retina. *Neuron* **75**, 786-798.

791 **Herbomel, P., Thisse, B. and Thisse, C.** (2001). Zebrafish early macrophages colonize  
792 cephalic mesenchyme and developing brain, retina, and epidermis through a M-CSF  
793 receptor-dependent invasive process. *Dev Biol* **238**, 274-288.

794 **Hu, M. and Easter, S. S.** (1999). Retinal neurogenesis: the formation of the initial  
795 central patch of postmitotic cells. *Dev Biol* **207**, 309-321.

796 **Hume, D. A., Perry, V. H. and Gordon, S.** (1983). Immunohistochemical localization  
797 of a macrophage-specific antigen in developing mouse retina: phagocytosis of dying  
798 neurons and differentiation of microglial cells to form a regular array in the plexiform  
799 layers. *J Cell Biol* **97**, 253-257.

800 **Imai, F., Yoshizawa, A., Matsuzaki, A., Oguri, E., Araragi, M., Nishiwaki, Y. and**  
801 **Masai, I.** (2014). Stem-loop binding protein is required for retinal cell proliferation,  
802 neurogenesis, and intraretinal axon pathfinding in zebrafish. *Dev Biol* **394**, 94-109.

803 **Ito, M. and Yoshioka, M.** (1999). Regression of the hyaloid vessels and pupillary  
804 membrane of the mouse. *Anat Embryol (Berl)* **200**, 403-411.

805 **Jin, S. W., Beis, D., Mitchell, T., Chen, J. N. and Stainier, D. Y.** (2005). Cellular and  
806 molecular analyses of vascular tube and lumen formation in zebrafish. *Development* **132**,  
807 5199-5209.

808 **Jusuf, P. R. and Harris, W. A.** (2009). Ptf1a is expressed transiently in all types of  
809 amacrine cells in the embryonic zebrafish retina. *Neural Dev* **4**, 34.

810 **Kaufman, R., Weiss, O., Sebbagh, M., Ravid, R., Gibbs-Bar, L., Yaniv, K. and**  
811 **Inbal, A.** (2015). Development and origins of zebrafish ocular vasculature. *BMC Dev*  
812 *Biol* **15**, 18.

813 **Kay, J. N., Finger-Baier, K. C., Roeser, T., Staub, W. and Baier, H.** (2001). Retinal  
814 ganglion cell genesis requires lakritz, a Zebrafish atonal Homolog. *Neuron* **30**, 725-736.

815 **Kim, D., Paggi, J. M., Park, C., Bennett, C. and Salzberg, S. L.** (2019). Graph-based  
816 genome alignment and genotyping with HISAT2 and HISAT-genotype. *Nat Biotechnol*  
817 **37**, 907-915.

818 **Koster, R. W. and Fraser, S. E.** (2001). Tracing transgene expression in living  
819 zebrafish embryos. *Dev Biol* **233**, 329-346.

820 **Lang, R. A. and Bishop, J. M.** (1993). Macrophages are required for cell death and  
821 tissue remodeling in the developing mouse eye. *Cell* **74**, 453-462.

822 **Langheinrich, U., Hennen, E., Stott, G. and Vacun, G.** (2002). Zebrafish as a model  
823 organism for the identification and characterization of drugs and genes affecting p53  
824 signaling. *Curr Biol* **12**, 2023-2028.

825 **Lawson, L. J., Perry, V. H., Dri, P. and Gordon, S.** (1990). Heterogeneity in the  
826 distribution and morphology of microglia in the normal adult mouse brain.  
827 *Neuroscience* **39**, 151-170.

828 **Li, Q., Shirabe, K., Thisse, C., Thisse, B., Okamoto, H., Masai, I. and Kuwada, J. Y.**  
829 (2005). Chemokine signaling guides axons within the retina in zebrafish. *J Neurosci* **25**,  
830 1711-1717.

831 **Lobov, I. B., Cheung, E., Wudali, R., Cao, J., Halasz, G., Wei, Y., Economides, A.,**  
832 **Lin, H. C., Papadopoulos, N., Yancopoulos, G. D., et al.** (2011). The Dll4/Notch  
833 pathway controls postangiogenic blood vessel remodeling and regression by modulating  
834 vasoconstriction and blood flow. *Blood* **117**, 6728-6737.

835 **Lobov, I. B., Rao, S., Carroll, T. J., Vallance, J. E., Ito, M., Ondr, J. K., Kurup, S.,**  
836 **Glass, D. A., Patel, M. S., Shu, W., et al.** (2005). WNT7b mediates macrophage-  
837 induced programmed cell death in patterning of the vasculature. *Nature* **437**, 417-421.

838 **Masai, I., Lele, Z., Yamaguchi, M., Komori, A., Nakata, A., Nishiwaki, Y., Wada,**  
839 **H., Tanaka, H., Nojima, Y., Hammerschmidt, M., et al.** (2003). N-cadherin mediates  
840 retinal lamination, maintenance of forebrain compartments and patterning of retinal  
841 neurites. *Development* **130**, 2479-2494.

842 **Masai, I., Stemple, D. L., Okamoto, H. and Wilson, S. W.** (2000). Midline signals  
843 regulate retinal neurogenesis in zebrafish. *Neuron* **27**, 251-263.

844 **Masai, I., Yamaguchi, M., Tonou-Fujimori, N., Komori, A. and Okamoto, H.**  
845 (2005). The hedgehog-PKA pathway regulates two distinct steps of the differentiation  
846 of retinal ganglion cells: the cell-cycle exit of retinoblasts and their neuronal maturation.  
847 *Development* **132**, 1539-1553.

848 **Mochizuki, T., Luo, Y. J., Tsai, H. F., Hagiwara, A. and Masai, I.** (2017). Cell  
849 division and cadherin-mediated adhesion regulate lens epithelial cell movement in  
850 zebrafish. *Development* **144**, 708-719.

851 **Mochizuki, T., Suzuki, S. and Masai, I.** (2014). Spatial pattern of cell geometry and  
852 cell-division orientation in zebrafish lens epithelium. *Biol Open* **3**, 982-994.

853 **Neumann, H., Kotter, M. R. and Franklin, R. J.** (2009). Debris clearance by  
854 microglia: an essential link between degeneration and regeneration. *Brain* **132**, 288-295.

855 **O'Koren, E. G., Yu, C., Klingeborn, M., Wong, A. Y. W., Prigge, C. L., Mathew,**  
856 **R., Kalnitsky, J., Msallam, R. A., Silvín, A., Kay, J. N., et al.** (2019). Microglial  
857 Function Is Distinct in Different Anatomical Locations during Retinal Homeostasis and  
858 Degeneration. *Immunity* **50**, 723-737 e727.

859 **Paolicelli, R. C., Bolasco, G., Pagani, F., Maggi, L., Scianni, M., Panzanelli, P.,**  
860 **Giustetto, M., Ferreira, T. A., Guiducci, E., Dumas, L., et al.** (2011). Synaptic  
861 pruning by microglia is necessary for normal brain development. *Science* **333**, 1456-  
862 1458.

863 **Poggi, L., Vitorino, M., Masai, I. and Harris, W. A.** (2005). Influences on neural  
864 lineage and mode of division in the zebrafish retina in vivo. *J Cell Biol* **171**, 991-999.

865 **Rhodes, J., Hagen, A., Hsu, K., Deng, M., Liu, T. X., Look, A. T. and Kanki, J. P.**  
866 (2005). Interplay of pu.1 and gata1 determines myelo-erythroid progenitor cell fate in  
867 zebrafish. *Dev Cell* **8**, 97-108.

868 **Robinson, M. D., McCarthy, D. J. and Smyth, G. K.** (2010). edgeR: a Bioconductor  
869 package for differential expression analysis of digital gene expression data.  
870 *Bioinformatics* **26**, 139-140.

871 **Rymo, S. F., Gerhardt, H., Wolfhagen Sand, F., Lang, R., Uv, A. and Betsholtz, C.**  
872 (2011). A two-way communication between microglial cells and angiogenic sprouts  
873 regulates angiogenesis in aortic ring cultures. *PLoS One* **6**, e15846.

874 **Santos, A. M., Calvente, R., Tassi, M., Carrasco, M. C., Martín-Oliva, D., Marin-**  
875 **Teva, J. L., Navascues, J. and Cuadros, M. A.** (2008). Embryonic and postnatal  
876 development of microglial cells in the mouse retina. *J Comp Neurol* **506**, 224-239.

877 **Scheer, N. and Campos-Ortega, J. A.** (1999). Use of the Gal4-UAS technique for  
878 targeted gene expression in the zebrafish. *Mech Dev* **80**, 153-158.

879 **Scheer, N., Riedl, I., Warren, J. T., Kuwada, J. Y. and Campos-Ortega, J. A.**  
880 (2002). A quantitative analysis of the kinetics of Gal4 activator and effector gene  
881 expression in the zebrafish. *Mech Dev* **112**, 9-14.

882 **Schmieder, R. and Edwards, R.** (2011). Quality control and preprocessing of  
883 metagenomic datasets. *Bioinformatics* **27**, 863-864.

884 **Sehnert, A. J., Huq, A., Weinstein, B. M., Walker, C., Fishman, M. and Stainier, D.**  
885 **Y. R.** (2002). Cardiac troponin T is essential in sarcomere assembly and cardiac  
886 contractility. *Nat Genet* **31**, 106-110.

887 **Shiau, C. E., Kaufman, Z., Meireles, A. M. and Talbot, W. S.** (2015). Differential  
888 requirement for irf8 in formation of embryonic and adult macrophages in zebrafish.  
889 *PLoS One* **10**, e0117513.

890 **Sierra, A., Encinas, J. M., Deudero, J. J., Chancey, J. H., Enikolopov, G.,**  
891 **Overstreet-Wadiche, L. S., Tsirka, S. E. and Maletic-Savatic, M.** (2010). Microglia  
892 shape adult hippocampal neurogenesis through apoptosis-coupled phagocytosis. *Cell*  
893 *Stem Cell* **7**, 483-495.

894 **Stachura, D. L. and Traver, D.** (2011). Cellular dissection of zebrafish hematopoiesis.  
895 *Methods Cell Biol* **101**, 75-110.

896 **Svahn, A. J., Graeber, M. B., Ellett, F., Lieschke, G. J., Rinkwitz, S., Bennett, M. R.**  
897 **and Becker, T. S.** (2013). Development of ramified microglia from early macrophages  
898 in the zebrafish optic tectum. *Dev Neurobiol* **73**, 60-71.

899 **Tremblay, M. E., Lowery, R. L. and Majewska, A. K.** (2010). Microglial interactions  
900 with synapses are modulated by visual experience. *PLoS Biol* **8**, e1000527.

901 **Urasaki, A., Morvan, G. and Kawakami, K.** (2006). Functional dissection of the Tol2  
902 transposable element identified the minimal cis-sequence and a highly repetitive  
903 sequence in the subterminal region essential for transposition. *Genetics* **174**, 639-649.

904 **Walton, E. M., Cronan, M. R., Beerman, R. W. and Tobin, D. M.** (2015). The  
905 Macrophage-Specific Promoter mfap4 Allows Live, Long-Term Analysis of  
906 Macrophage Behavior during Mycobacterial Infection in Zebrafish. *PLoS One* **10**,  
907 e0138949.

908 **Westerfield, M.** (1993). *The zebrafish book : a guide for the laboratory use of*  
909 *zebrafish (Brachydanio rerio)*. Eugene, OR: M. Westerfield.

910 **White, D. T., Sengupta, S., Saxena, M. T., Xu, Q., Hanes, J., Ding, D., Ji, H. and**  
911 **Mumm, J. S.** (2017). Immunomodulation-accelerated neuronal regeneration following  
912 selective rod photoreceptor cell ablation in the zebrafish retina. *Proc Natl Acad Sci U S*  
913 *A* **114**, E3719-E3728.



914 **Wu, S., Xue, R., Hassan, S., Nguyen, T. M. L., Wang, T., Pan, H., Xu, J., Liu, Q.,**  
915 **Zhang, W. and Wen, Z.** (2018). Il34-Csf1r Pathway Regulates the Migration and  
916 Colonization of Microglial Precursors. *Dev Cell* **46**, 552-563.e554.

917 **Xu, J., Du, L. and Wen, Z.** (2012). Myelopoiesis during zebrafish early development.  
918 *J Genet Genomics* **39**, 435-442.

919 **Xu, J., Wang, T., Wu, Y., Jin, W. and Wen, Z.** (2016). Microglia Colonization of  
920 Developing Zebrafish Midbrain Is Promoted by Apoptotic Neuron and  
921 Lysophosphatidylcholine. *Dev Cell* **38**, 214-222.

922 **Xu, J., Zhu, L., He, S., Wu, Y., Jin, W., Yu, T., Qu, J. Y. and Wen, Z.** (2015).  
923 Temporal-Spatial Resolution Fate Mapping Reveals Distinct Origins for Embryonic and  
924 Adult Microglia in Zebrafish. *Dev Cell* **34**, 632-641.

925 **Yamaguchi, M., Imai, F., Tonou-Fujimori, N. and Masai, I.** (2010). Mutations in N-  
926 cadherin and a Stardust homolog, Nagie oko, affect cell-cycle exit in zebrafish retina.  
927 *Mech Dev* **127**, 247-264.

928 **Yamaguchi, M., Tonou-Fujimori, N., Komori, A., Maeda, R., Nojima, Y., Li, H.,**  
929 **Okamoto, H. and Masai, I.** (2005). Histone deacetylase 1 regulates retinal  
930 neurogenesis in zebrafish by suppressing Wnt and Notch signaling pathways.  
931 *Development* **132**, 3027-3043.

932 **Yashiro, K., Shiratori, H. and Hamada, H.** (2007). Haemodynamics determined by a  
933 genetic programme govern asymmetric development of the aortic arch. *Nature* **450**,  
934 285-288.  
935  
936



## 937 **Figure Legends**

### 938 **Figure 1. Microglial precursors progressively colonize developing zebrafish retinas**

- 939 A) Lateral view of zebrafish eyes used for confocal scanning shown in panel (B).  
 940 Anterior is left and dorsal is up. The choroid fissure (cf, arrows) is formed at the  
 941 ventral retina. At 32 hpf, the interface space between the neural retina (nr) and lens  
 942 appears, in which ocular blood vessels are formed after 36 hpf. At 48 hpf, RGCL  
 943 and INL are distinct. At 54 hpf, the ONL becomes evident.
- 944 B) Three-dimensional confocal images of *mpeg1.1:EGFP*-positive microglial  
 945 precursors (green) in the retina from 32 to 54 hpf. Dotted circles indicate the outline  
 946 of the optic cup. The first microglial precursors appear in the choroid fissure and  
 947 near the lens at 32 hpf. Microglial precursors in the optic cup progressively increase  
 948 in number. At 42 hpf, they start to enter retinal tissue and spread into the entire  
 949 neural retina by 54 hpf.
- 950 C) Histogram of the number of intraocular microglial precursors from 32 to 54 hpf.  
 951 Horizontal and vertical bars indicate means $\pm$ SD.
- 952 D) Three-dimensional confocal images of *Tg[EF1a:mCherry-zGem; mpeg1.1:EGFP]*  
 953 retinas from 32 to 54 hpf. *Tg[EF1a:mCherry-zGem]* (magenta) indicates cells  
 954 undergoing S and G2 phases. *mpeg1.1:EGFP*-positive microglial precursors (green)  
 955 are mostly negative for mCherry-zGem, suggesting that most ocular microglial  
 956 precursors are in G1 phase.
- 957 E) Histogram of the number of microglial precursors expressing only *mpeg1.1:EGFP*,  
 958 and microglial precursors expressing both mCherry-zGem and *mpeg1.1:EGFP* in  
 959 retinas from 32 to 54 hpf. Double-positive microglial precursors represent  
 960 proliferating microglial precursors undergoing S/G2 phase. Single *mpeg1.1:EGFP*-  
 961 positive microglial precursors represent microglial precursors in G1 phase. Bars and  
 962 lines indicate means $\pm$ SD.
- 963 Scale bars: 30  $\mu$ m.

964

### 965 **Figure 2. Microglial precursors migrate into the retina along blood vessels**

- 966 A) Live confocal images of *Tg[kdrl:EGFP; mfap4:tdTomato-CAAX]* retinas at 30 hpf.  
 967 Microglial precursors and blood vessels are visualized using fluorescence of  
 968 *mfap4tdTomato-CAAX* (magenta) and *kdrl:EGFP* (green), respectively. Higher

969 magnification image of a dotted square in the left panel is shown in the right panel.  
 970 The first microglial precursor (arrow) approaches along developing hyaloid blood  
 971 vessels near the lens through the choroid fissure. Arrowheads indicate peripheral  
 972 macrophages outside the optic cup. Scale bar: 30  $\mu$ m.

973 B) Time-lapse 3D snapshots of *Tg[kdrl:EGFP; mfap4:tdTomato-CAAX]* eyes for  
 974 around 3.5 hr after 32 hpf. Ocular microglial precursors and peripheral  
 975 macrophages outside the optic cup are indicated as yellow- and magenta-colored,  
 976 surface-rendered objects, respectively, which were prepared from the original  
 977 scanning image (Fig.2-figure supplement 1). Ocular blood vessels are visualized in  
 978 green. Microglia associated with hyaloid blood vessels around the lens gradually  
 979 increase and infiltrate neurogenic retinal tissue (arrows; Video 3). Scale bar: 30  $\mu$ m.

980 C) Live 3D images of eyes of *Tg[kdrl:EGFP; mfap4:tdTomato-CAAX]* embryos  
 981 injected with standard MO and *tnnt2a* MO. *kdrl:EGFP*-positive blood vessels (green)  
 982 are thinner in *tnnt2a* morphants. Scale bar: 50  $\mu$ m.

983 D) Histogram of the number of ocular microglial precursors in embryos injected with  
 984 standard MO and *tnnt2a* MO. Bars and lines indicate means $\pm$ SD. \*\*\**p*<0.001.

985

### 986 **Figure 3. Microglial precursors infiltrate the retina through the neurogenic area**

987 A) Schematic drawing of confocal scanning planes (superficial, middle, and deep  
 988 layers) in the optic cup shown in (B) and (D).

989 B) Live images of *Tg[EF1 $\alpha$ :mCherry-zGem; mpeg1.1:EGFP]* retinas at 42 hpf (upper  
 990 panels) and 48 hpf (lower panels). Two levels of confocal scanning planes are  
 991 indicated as superficial (a', a'') and deep positions (c', c''). *mpeg1.1:EGFP* positive  
 992 microglial precursors avoid mCherry-zGem positive proliferating retinal cell area.  
 993 Scale bar: 50  $\mu$ m.

994 C) Histogram of the fraction of microglial precursors associated with the mCherry-  
 995 zGem-positive area (black) and the mCherry-zGem-negative area (grey). The  
 996 fraction of microglial precursors associated with the mCherry-zGem-positive area  
 997 is only 7.37% at 42 hpf and 6.13% at 48 hpf. Thus, more than 90% of microglial  
 998 precursors is located in the mCherry-zGem-negative retinal area.

999 D) Live images of *Tg[ath5:EGFP; mfap4:tdTomato-CAAX]* retinas at 36 (upper  
1000 panels), 42 (middle panels) and 48 hpf (bottom panels). Three confocal scanning  
1001 plane levels are indicated as superficial (a'-a'''), middle (b'-b'''), and deep (c'-c''').  
1002 Dotted circles indicate the outline of the optic cup. The right-most column images  
1003 indicate higher magnification images shown in the square of left panels. mfap4-  
1004 positive microglia (magenta, arrows) are closely associated with ath5-positive  
1005 neurogenic cells (green). Scale bar: 50  $\mu$ m, except the right-most column images  
1006 (Scale bar: 15  $\mu$ m).

1007

1008 **Figure 4. Microglial precursor infiltration into the retina depends on retinal**  
1009 **neurogenesis**

1010 A) Live 3D images of wild-type and *slbp1* mutant retinas with *Tg[mfap4:tdTomato-*  
1011 *CAAX; ath5:EGFP]* at 49 hpf. Only mfap4:tdTomato-CAAX-positive ocular  
1012 microglial precursors and peripheral macrophages are shown as surface-rendered  
1013 objects. Original images are shown in Figure 4-figure supplement 2A. Scale bar: 30  
1014  $\mu$ m.

1015 B) Histogram of the number of ocular microglial precursors in *slbp1* mutants and wild-  
1016 type siblings. mfap4-positive microglial precursors are significantly fewer in *slbp1*  
1017 mutants. Bars and lines indicate means $\pm$ SD. \*\*\*p<0.001.

1018 C) Live 3D images of wild-type and *slbp1* mutant trunk with *Tg[mfap4:tdTomato-*  
1019 *CAAX; ath5:EGFP]* at 49 hpf. Scale bar: 70  $\mu$ m.

1020 D) Histogram of the number of trunk macrophages in *slbp1* mutants and wild-type  
1021 siblings. There is no significant difference in mfap4-positive macrophage number in  
1022 trunks of *slbp1* mutants. Bars and lines indicate means $\pm$ SD.

1023 E) Live 3D images of retinas of *Tg[rx1:gal4-VP16; mfap4:tdTomato-CAAX]* embryos  
1024 injected with one DNA construct encoding *UAS:EGFP* (left) or two DNA constructs  
1025 encoding *UAS:EGFP; UAS:myc-tagged NICD* (right) at 44 hpf. Only  
1026 mfap4:tdTomato-CAAX-positive ocular microglial precursors and peripheral  
1027 macrophages are shown as surface-rendered objects. Original images are shown in  
1028 Figure 4-figure supplement 2B. Scale bar: 30  $\mu$ m

1029 F) Histogram of numbers of ocular microglial precursors in *rx1:gal4-VPI6; UAS:EGFP*  
 1030 expressed and *rx1:gal4-VPI6; UAS:EGFP; UAS:myc-NICD* expressed wild-type  
 1031 retinas. mfap4-positive microglia are significantly decreased in *myc-NICD* expressed  
 1032 retinas, compared with non-injection control and *EGFP* expressed control retinas.  
 1033 Bars and lines indicate means $\pm$ SD. \*p<0.05, \*\*\*p<0.001.

1034 G) Live 3D images of standard MO and *ath5* MO injected retinas of  
 1035 *Tg[mfap4:tdTomato-CAAX; ath5:EGFP]* embryos at 49 hpf. Only mfap4:tdTomato-  
 1036 CAAX-positive ocular microglial precursors and peripheral macrophages are shown  
 1037 as surface-rendered objects. Original images are shown in Figure 4-figure  
 1038 supplement 2C. Scale bar: 30  $\mu$ m

1039 H) Histogram of numbers of ocular microglial precursors in standard MO and *ath5* MO-  
 1040 injected wild-type retinas. mfap4-positive microglial precursors are significantly less  
 1041 numerous in *ath5* morphant retinas. Bars and lines indicate means $\pm$ SD. \*p<0.05.

1042

1043 **Figure 5. Microglial precursors are preferentially associated with neurogenic**  
 1044 **retinal columns**

1045 A) Schematic drawing of cell transplantation experiments. Wild-type donor embryos  
 1046 are labeled with Alexa-448-dextran and transplanted into *slbp1* mutant recipient  
 1047 embryos at blastula stage. In *slbp1* mutant recipient embryos, transplanted wild-type  
 1048 donor cells form retinal cell columns. The host *slbp1* mutant line is combined with  
 1049 *Tg[mfap4:tdTomato-CAAX]*, to investigate whether mfap4-positive microglial  
 1050 precursors (magenta) infiltrate the neural retina preferentially through Alexa-448-  
 1051 dextran-labeled, wild-type donor columns (green) in *slbp1* mutant recipient embryos.

1052 B) Live images of *slbp1* mutant retinas with transplanted wild-type donor retinal cell  
 1053 columns at 48 hpf. Donor wild-type retinal cell columns are labeled with Alexa-488  
 1054 dextran (green). Host microglial precursors are visualized with the transgene  
 1055 *Tg[mfap4:tdTomato-CAAX]* (magenta). Dotted circles indicate the outline of the  
 1056 optic cup. Many microglial precursors are associated with wild-type donor retinal  
 1057 columns in *slbp1* mutant host retinas (right panel), compared with wild-type sibling  
 1058 host retinas (left panel). Scale bar: 30  $\mu$ m

- 1059 C) The fraction of mfap4-positive microglial precursors associated with donor  
1060 transplanted retinal cell columns versus the total number of microglial precursors in  
1061 the optic cup. The average fraction of mfap4-positive cells associated with donor  
1062 retinal cell columns is significantly higher in *slbp1* mutant host retinas than in wild-  
1063 type host retinas. Bars and lines indicate means $\pm$ SD. \*p<0.05.
- 1064 D) The trapping efficiency of mfap4-positive microglial precursors per donor column.  
1065 The average trapping efficiency is significantly higher in *slbp1* mutant host retinas  
1066 than in wild-type host retinas, suggesting higher affinity of microglial precursors for  
1067 neurogenic retinal cells. Bars and lines indicate means $\pm$ SD. \*\*p<0.01.
- 1068 E) Schematic drawing of mosaic expression of NICD in retinas. A mixture of  
1069 UAS:EGFP and UAS-myc-NICD plasmids was injected into fertilized eggs of the  
1070 *Tg[hsp:gal4; mfap4-tdTomato]* transgenic line, which were treated by heat shock at  
1071 18 and 30 hpf. At 48 hpf, embryos were fixed to prepare serial retinal sections for  
1072 imaging analysis.
- 1073 F) Confocal scanning of retinal sections of *Tg[hsp:gal4; mfap4-tdTomato]* transgenic  
1074 embryos injected with plasmids encoding UAS:EGFP or UAS:EGFP+UAS-myc-  
1075 NICD. Scale bar: 30  $\mu$ m.
- 1076 G) The fraction of mfap4-positive microglial precursors associated with EGFP-  
1077 expressing retinal cell columns versus the total number of microglial precursors in  
1078 the optic cup. The average fraction of mfap4-positive cells associated with EGFP-  
1079 positive retinal columns is significantly lower in retinas injected with  
1080 UAS:EGFP+UAS-myc-NICD than with only UAS:EGFP control. Bars and lines  
1081 indicate means $\pm$ SD. \*\*\*p<0.005.
- 1082 H) The trapping efficiency of mfap4-positive microglial precursors per EGFP-  
1083 expressing retinal cell columns. The average trapping efficiency is significantly  
1084 lower in retinas injected with UAS:EGFP+UAS-myc-NICD than with only  
1085 UAS:EGFP control, suggesting less affinity of microglial precursors for  
1086 proliferative NICD-expressing retinal cells. Bars and lines indicate means $\pm$ SD.  
1087 \*p<0.05.

1089 **Figure 6. IL34 is required for colonization of the optic cup by microglial**  
1090 **precursors.**

- 1091 A) Confocal 3D scanning of 48 hpf wild-type, *il34* heterozygous and homozygous  
1092 mutant retinas carrying the *Tg[mfap4:tdTomato-CAAX]* transgene. At 48 hpf,  
1093 iridophores start to differentiate around the optic cup, which causes a noise signal  
1094 (magenta) in confocal scanning. Using the surface-rendering tool of Imaris software  
1095 (Bitplane), we eliminated iridophore-derived noise and extracted mfap4:tdTomato-  
1096 CAAX signals from ocular microglial precursors (green) (See the legend of Figure  
1097 4-figure supplement 3). Scale bar: 50  $\mu$ m.
- 1098 B) Histogram of the number of ocular microglial precursors in wild-type, *il34*  
1099 heterozygous and homozygous mutant retinas at 48 hpf. The number of ocular  
1100 microglial precursors is almost zero, and very few, if any (one or two), in *il34*  
1101 homozygous mutants, indicating that ocular microglial precursors are significantly  
1102 reduced in *il34* homozygous mutants. The number of ocular microglial precursors is  
1103 mildly reduced in *il34* heterozygous mutants, but does not differ significantly from  
1104 that of wild-type siblings. Bars and lines indicate means $\pm$ SD. \*\*\* $p$ <0.005.
- 1105 C) A possible 3-step model of the guidance mechanism of microglial precursor into  
1106 zebrafish retina. Step1: IL34 expressed in the brain attracts microglial precursors.  
1107 Step2: Microglial precursors enter the optic cup along blood vessels. Step3:  
1108 Microglial precursors infiltrate the neural retina through the neurogenic area.  
1109



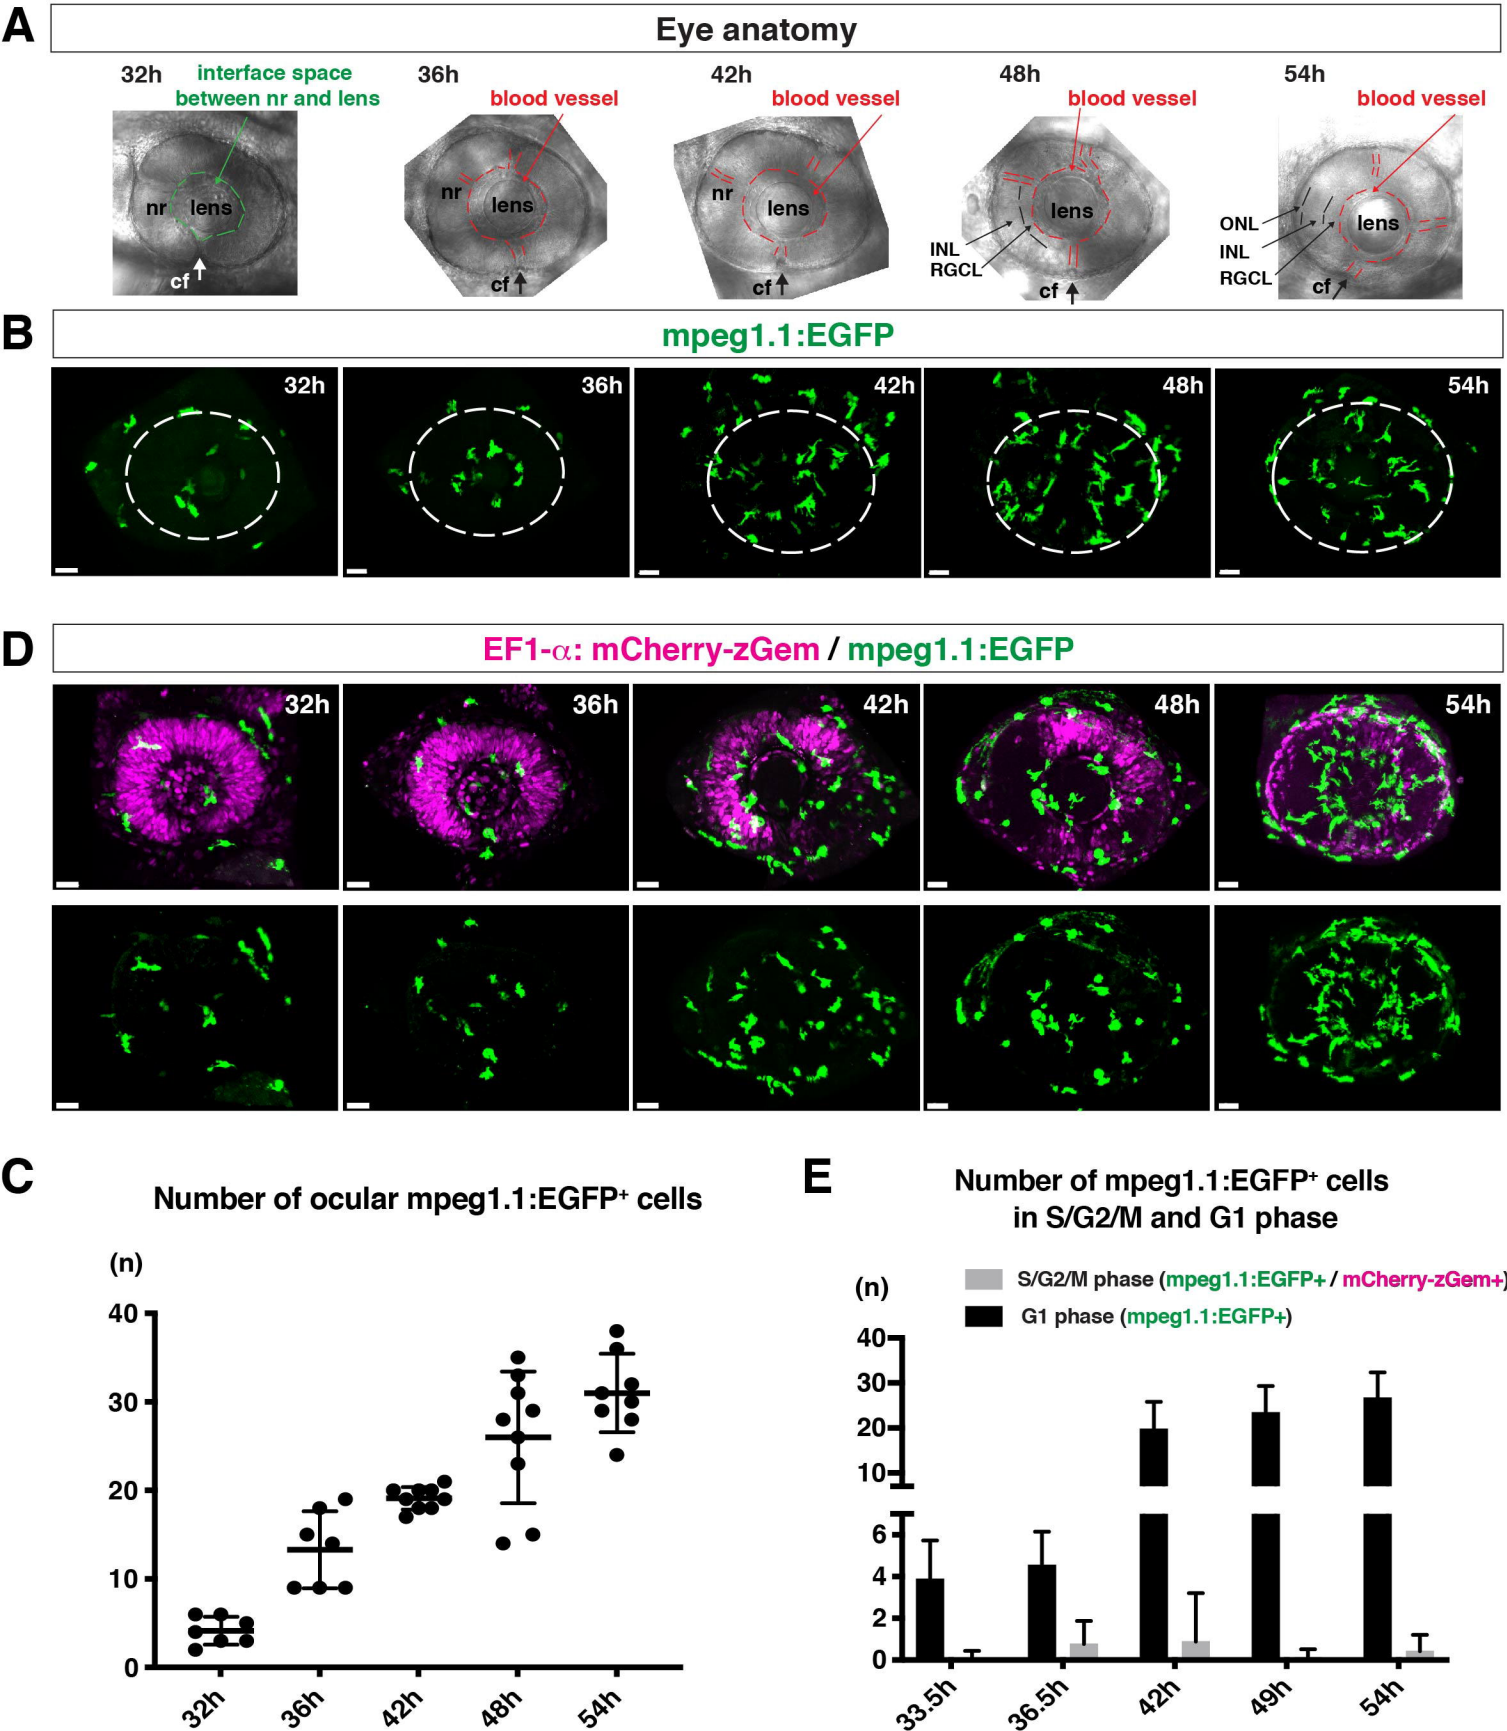

Figure 1



**A****kdrl: EGFP / mfap4: TdT-CAAX**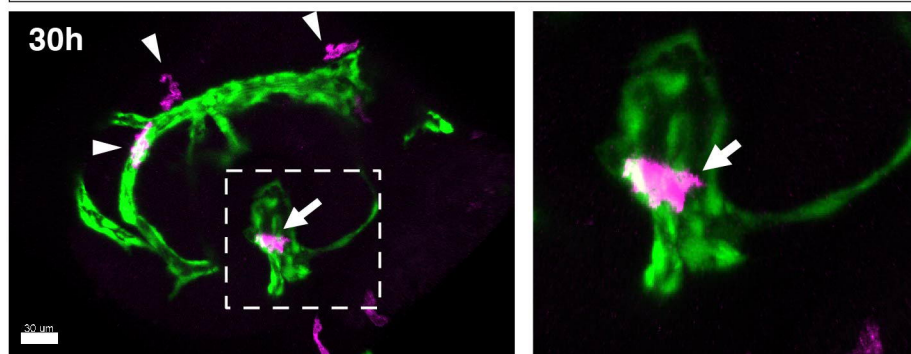**B**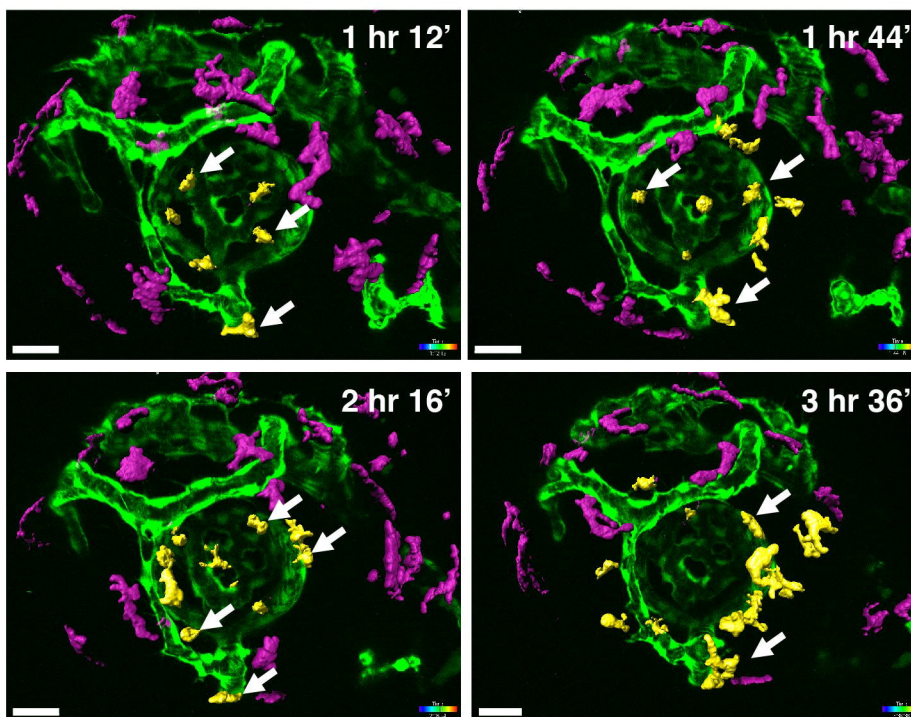**C**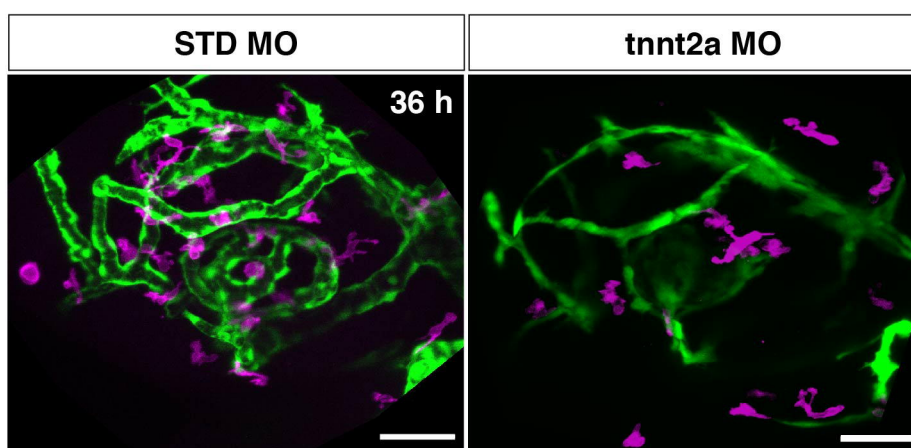**D**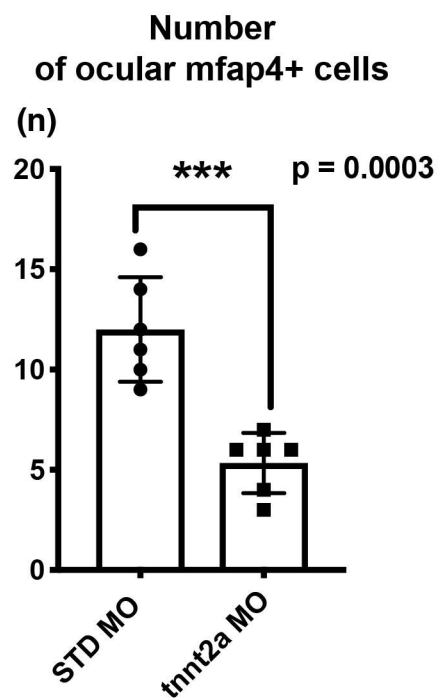**Figure 2**

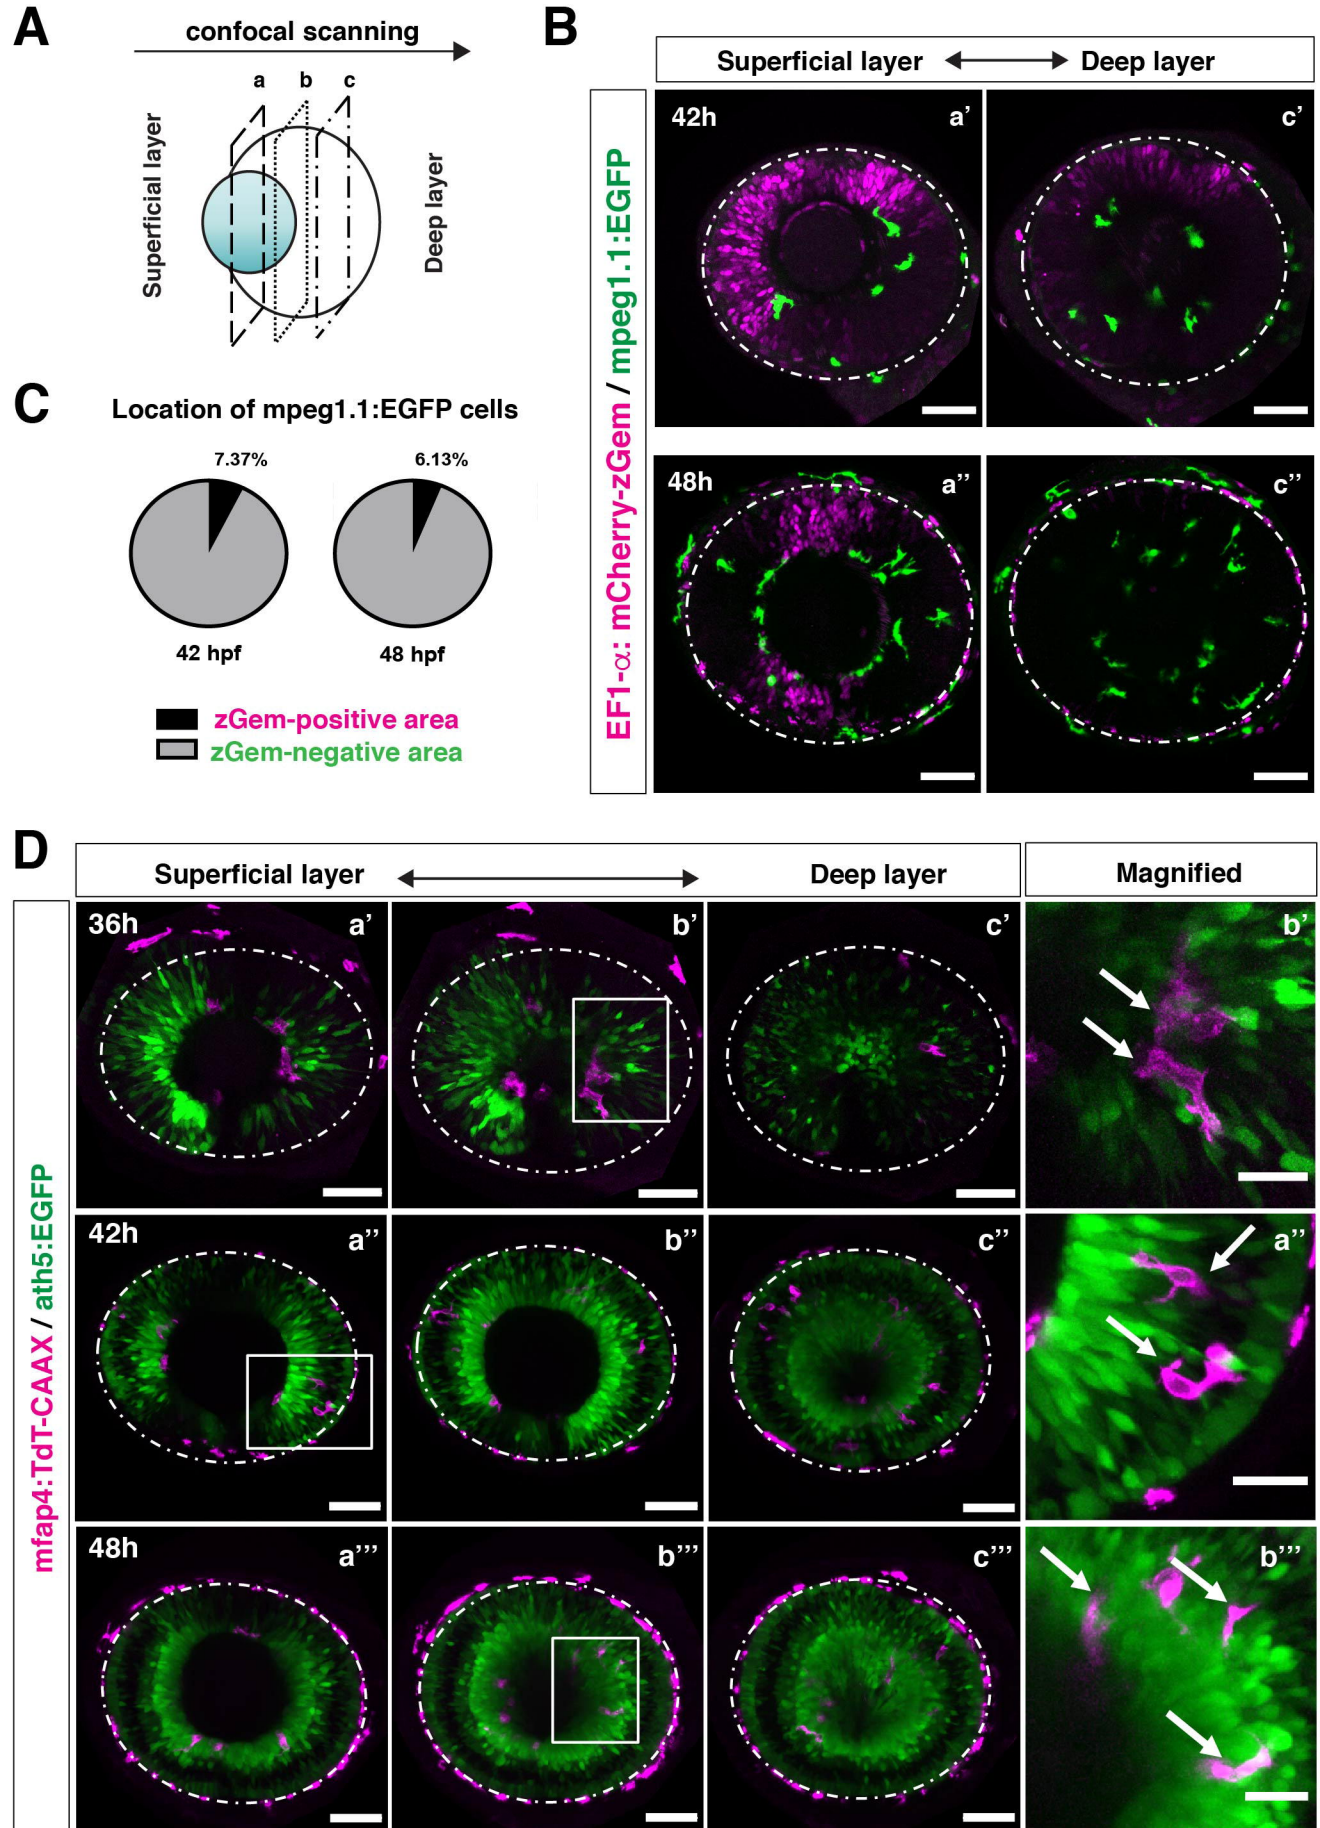

**Figure 3**



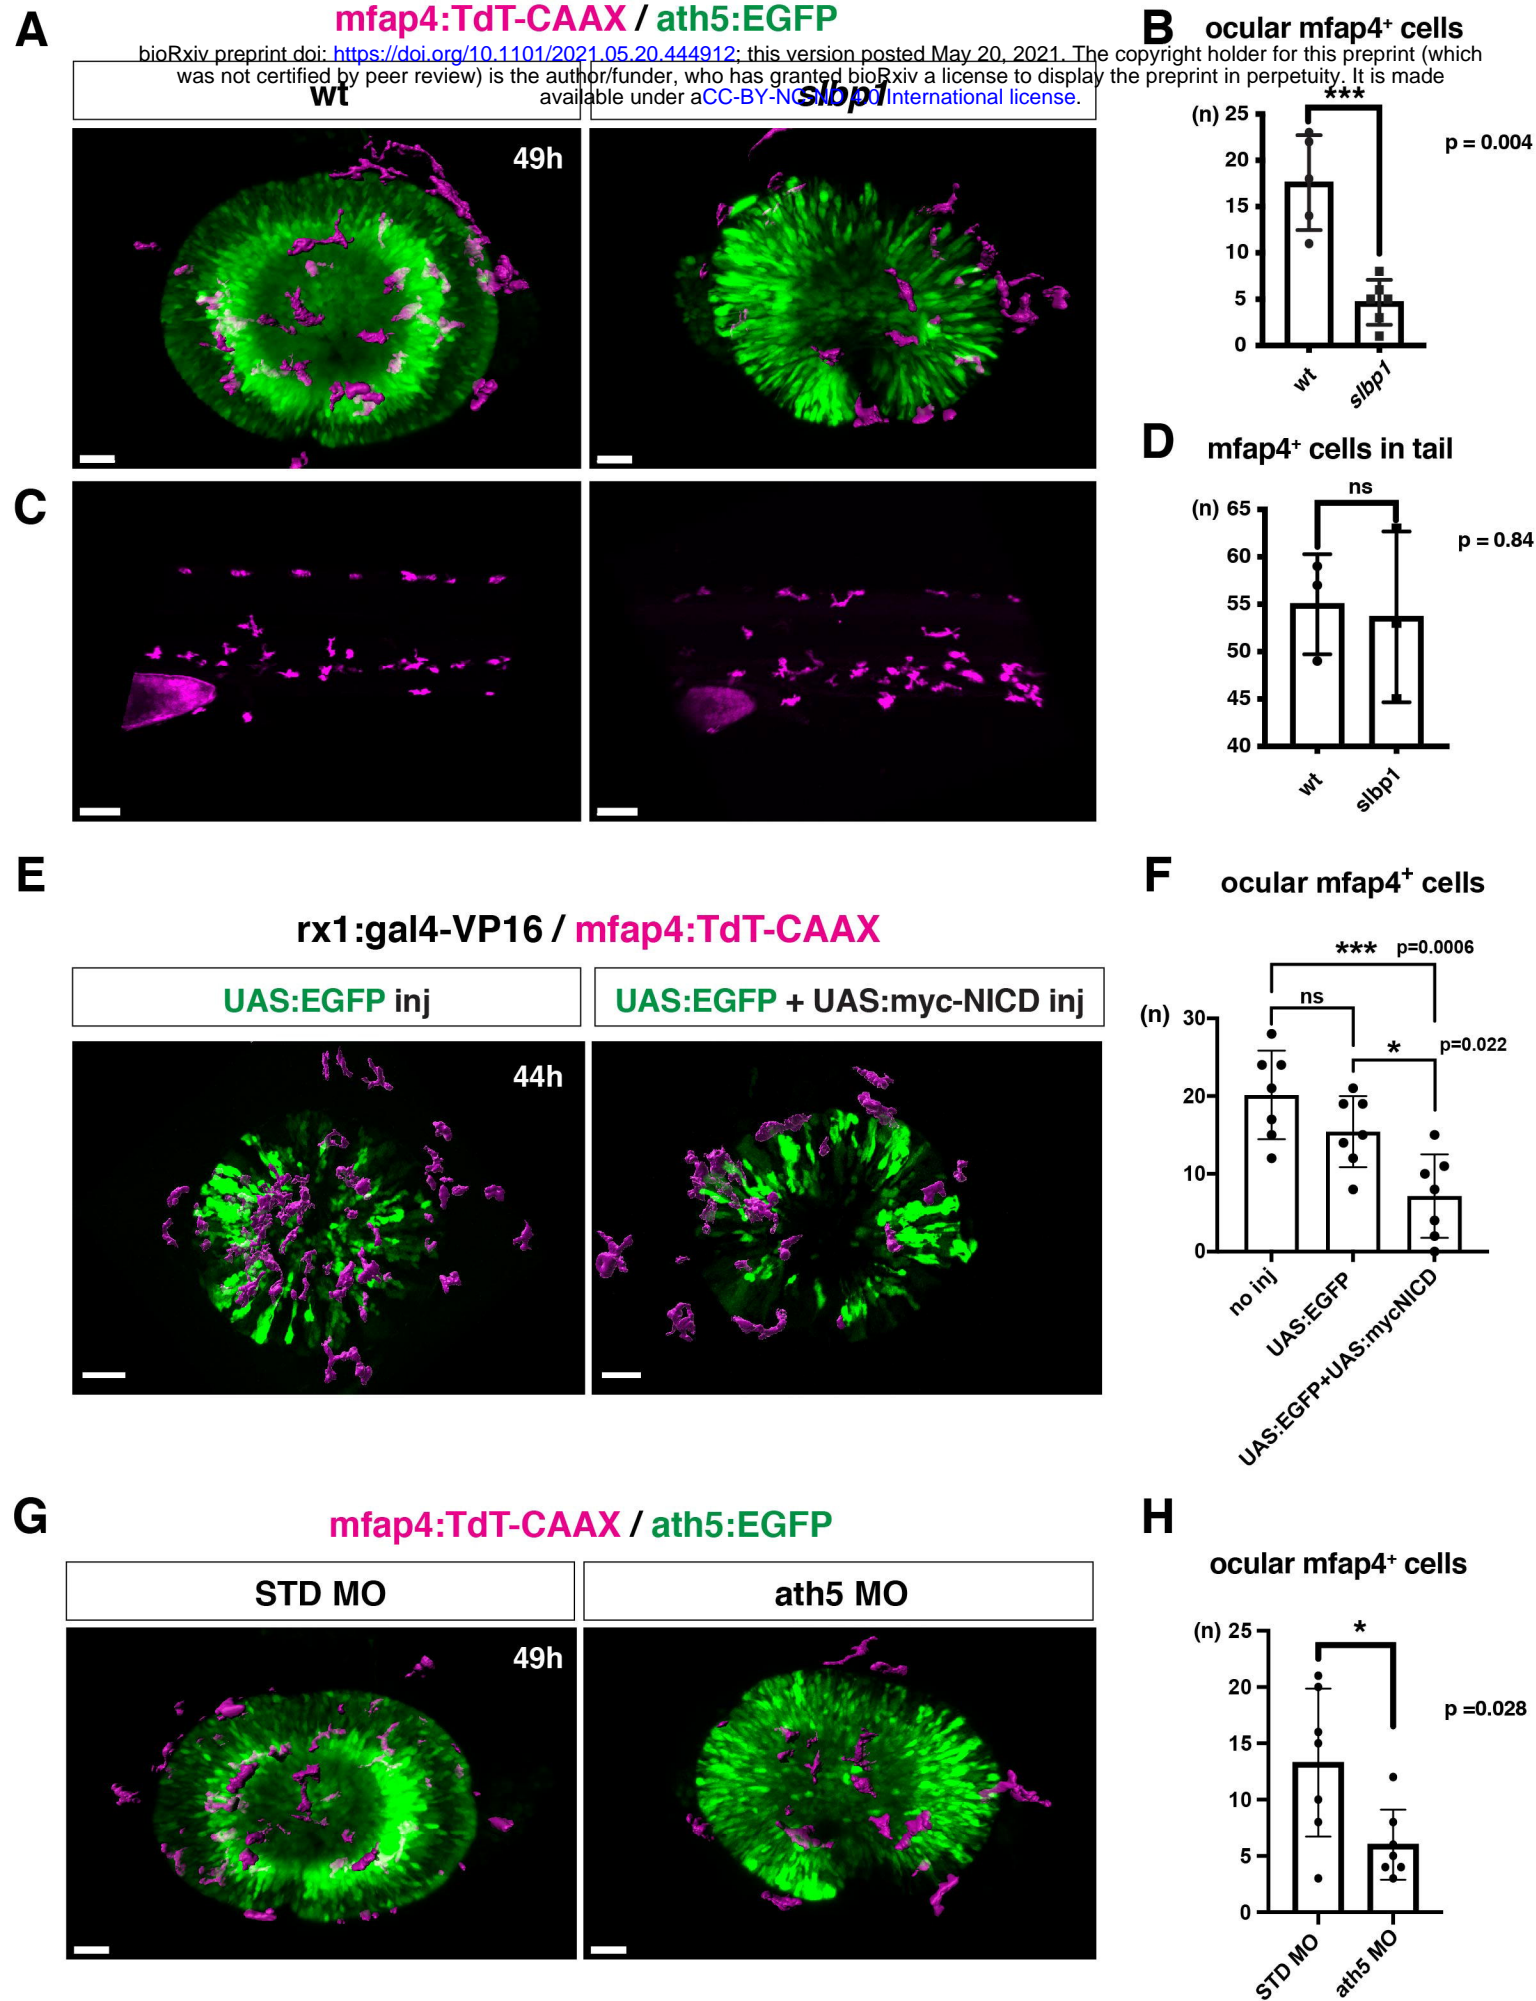

**A**

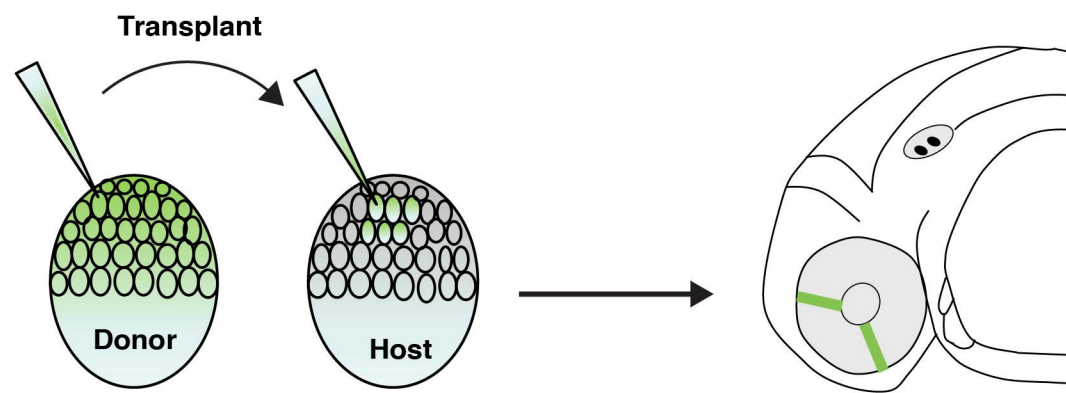

bioRxiv preprint doi: <https://doi.org/10.1101/2021.05.20.444912>; this version posted May 20, 2021. The copyright holder for this preprint (which was not certified by peer review) is the author/funder, who has granted bioRxiv a license to display the preprint in perpetuity. It is made available under aCC-BY-NC-ND 4.0 International license.

**B**

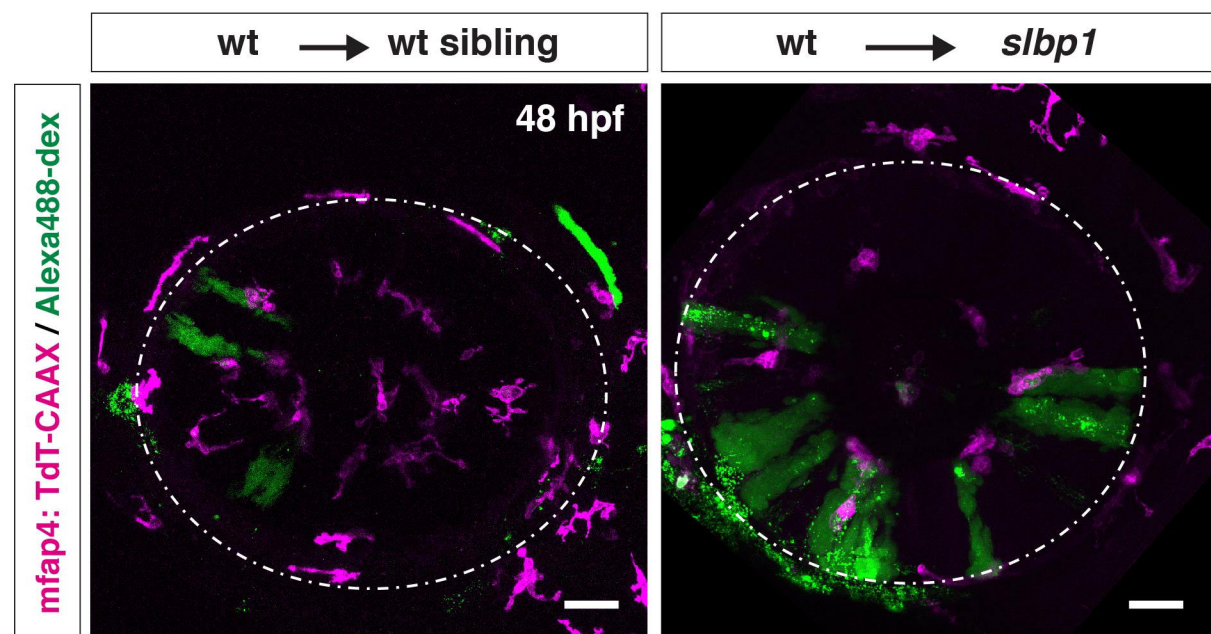

**C**

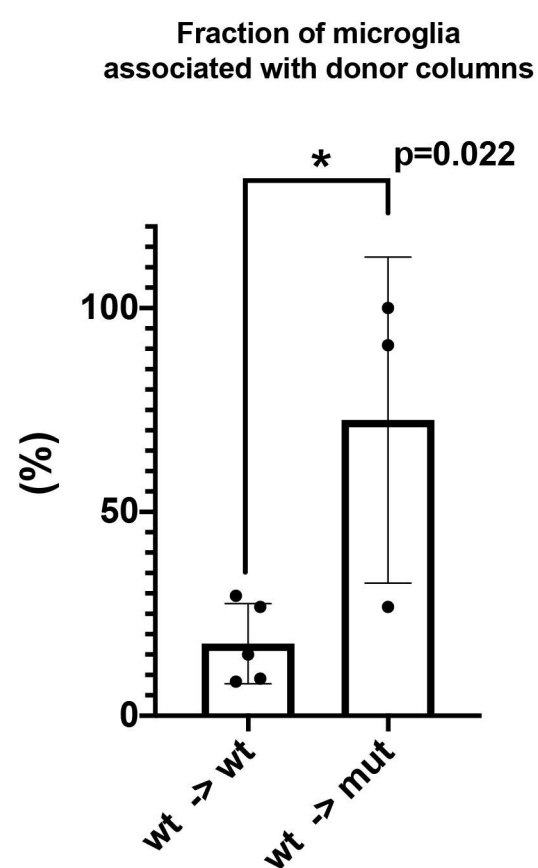

**D**

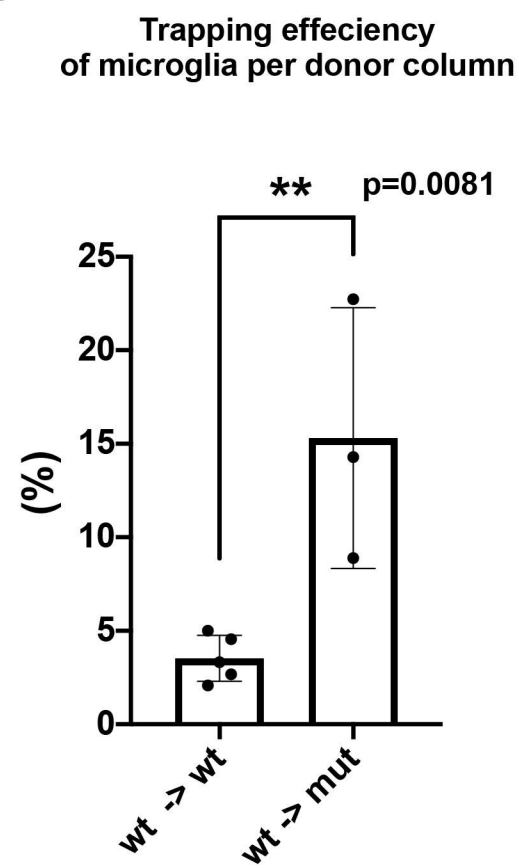

**E**

UAS:EGFP  
or  
UAS:EGFP + UAS:myc-NICD

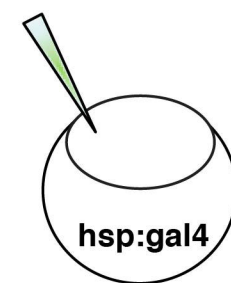

hs treatment  
at 18 and 30 hpf

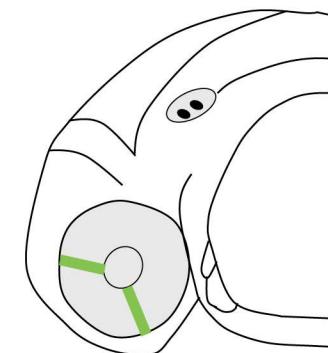

**F**

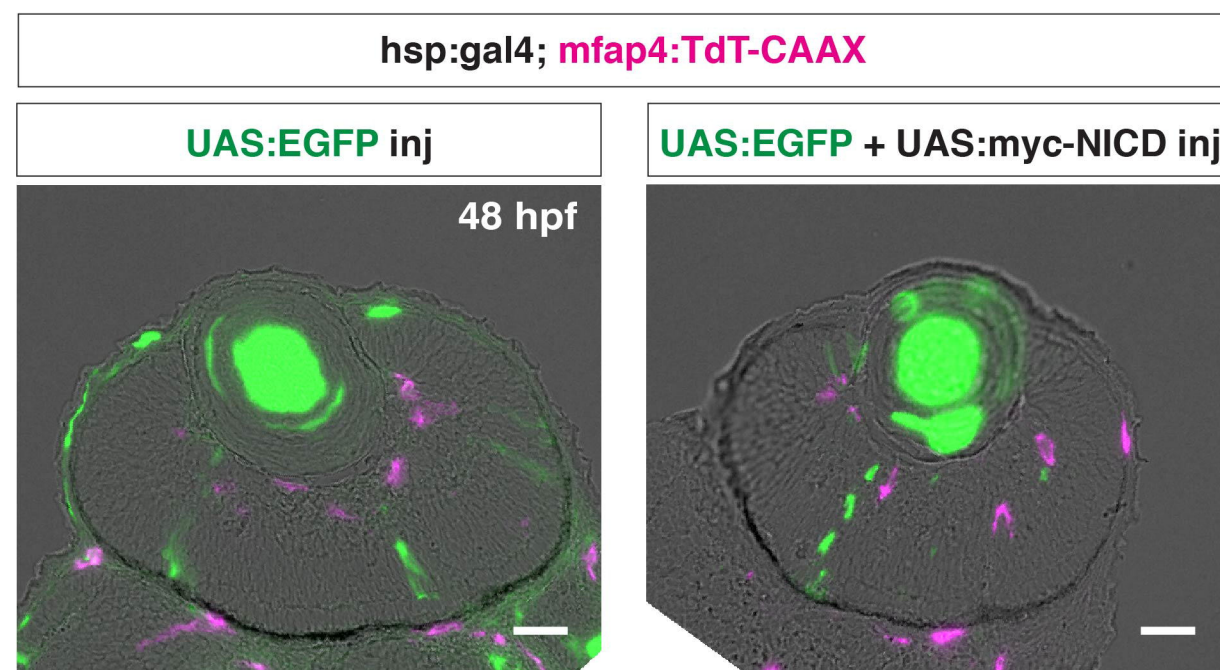

**G**

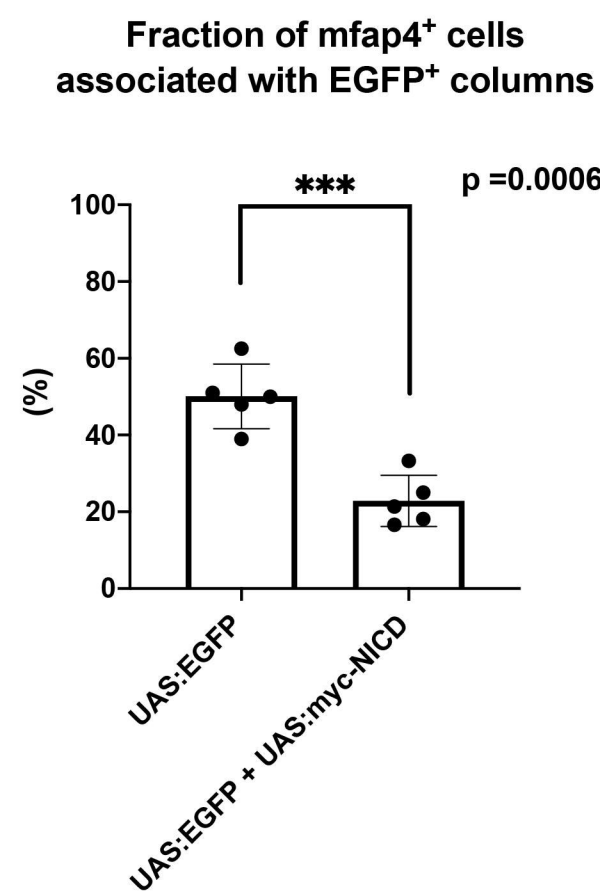

**H**

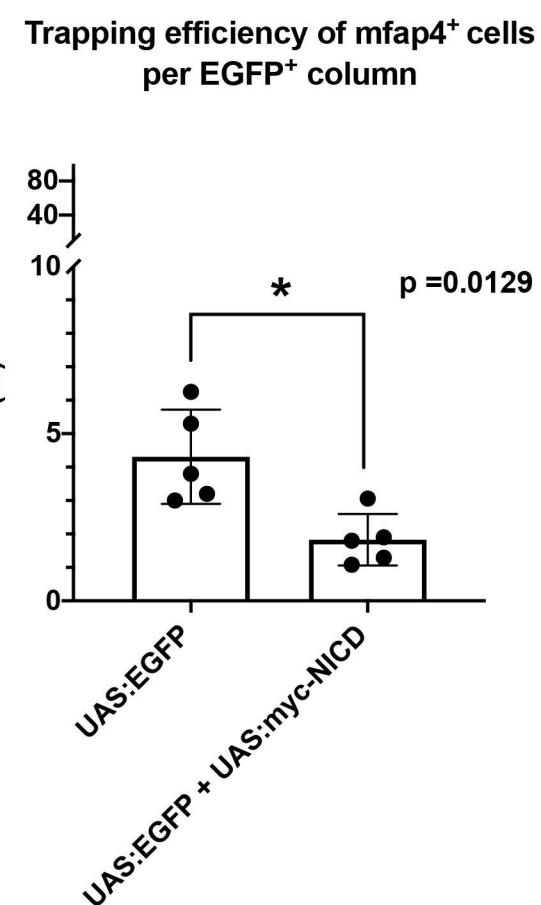

**Figure 5**



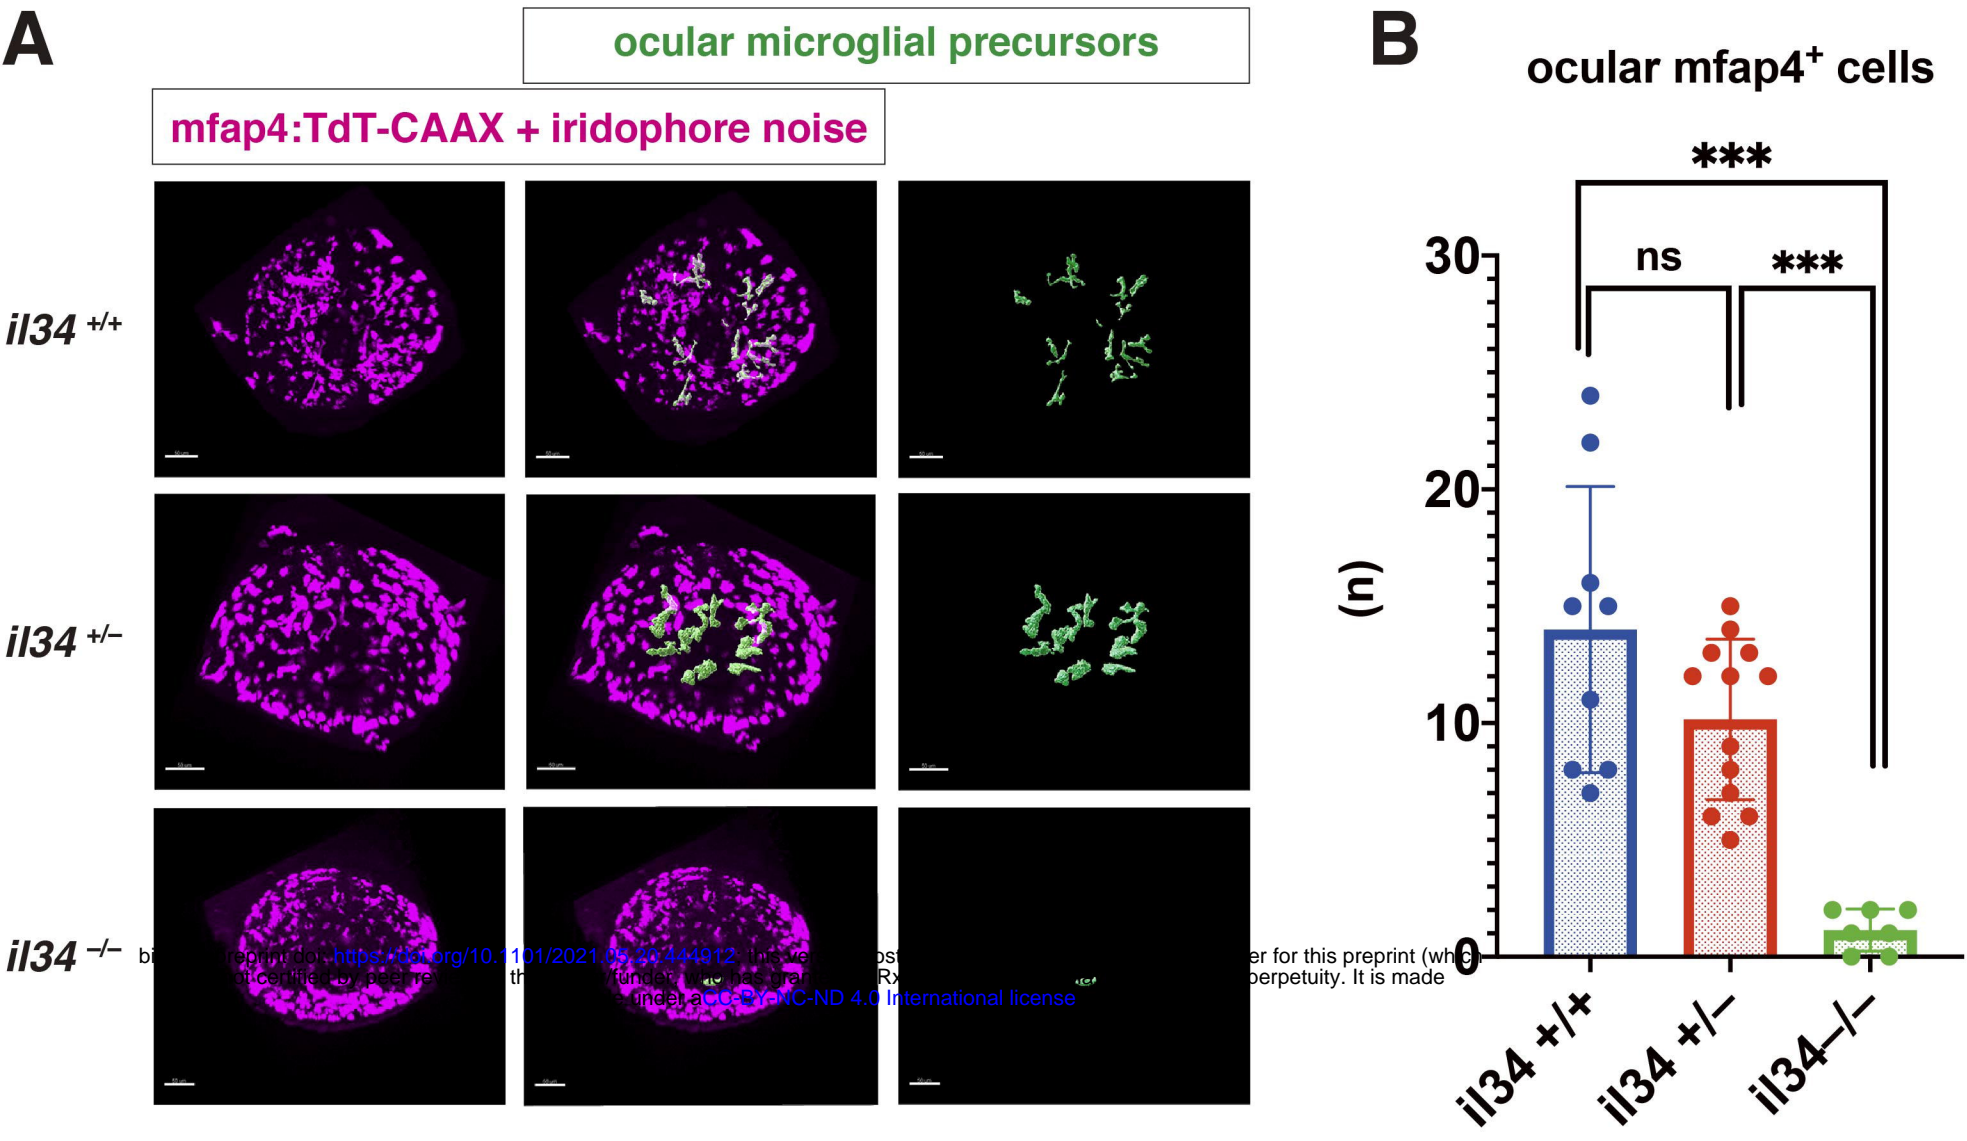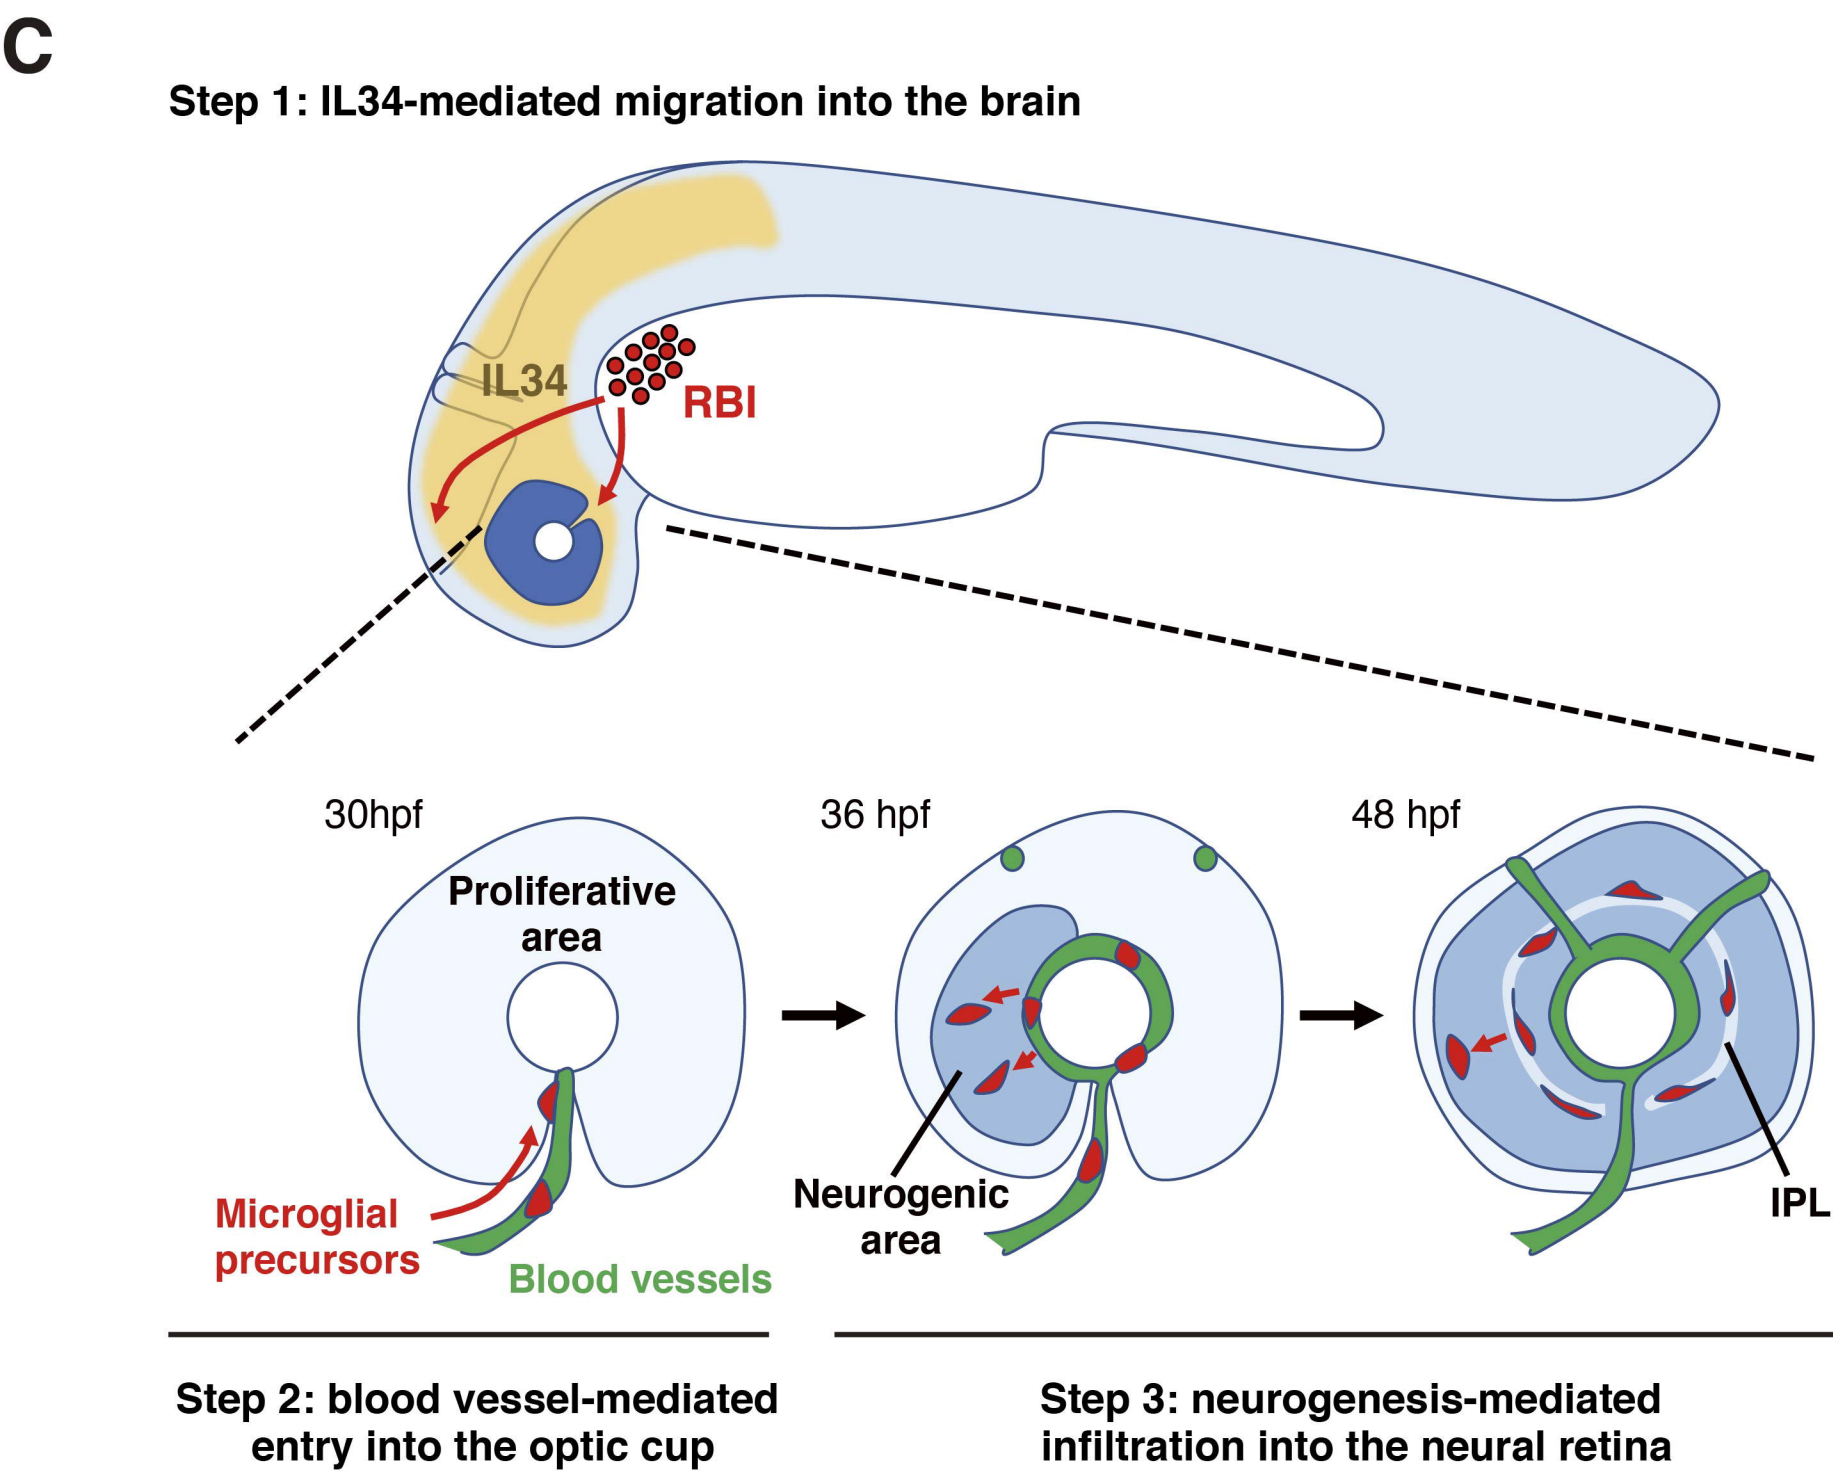

**Figure 6**
